# Supplementary material for: Multi-enzyme reaction inspired cascade photocatalysis for solar-driven CO2 reduction to ethane
Source: Research Square preprint supplement (doi:10.21203/rs.3.rs-5538574/v1), 2024-12-24
Supplement: Supplementary file 1 [file 17611f7f558f2670917cefe0.pdf]

## Supporting Information

### Multi-enzyme reaction inspired cascade photocatalysis for solar-driven CO<sub>2</sub> reduction to ethane

Qian Zhang<sup>1,†</sup>, Shuaiqi Gao<sup>1,†</sup>, Xiao Zhao<sup>2</sup>, Huiyong Wang<sup>1\*</sup>, Yingying Guo<sup>1</sup>, Zhimin Liu<sup>3\*</sup>, and Jianji Wang<sup>1\*</sup>

<sup>1</sup> Key Laboratory of Green Chemical Media and Reactions (Ministry of Education), Collaborative Innovation Centre of Henan Province for Green Manufacturing of Fine Chemicals, School of Chemistry and Chemical Engineering, Henan Normal University, Xinxiang, Henan 453007, P. R. China.

<sup>2</sup> Science and Technology on Aerospace Chemical Power Laboratory, Hubei Institute of Aerospace Chemotechnology, Hubei, 441003, P. R. China.

<sup>3</sup> Beijing National Laboratory for Molecular Sciences, Key Laboratory of Colloid, Interface and Thermodynamics, CAS Research/Education Centre for Excellence in Molecular Sciences, Institute of Chemistry, Chinese Academy of Sciences, Beijing 100190, P. R. China.

<sup>†</sup>These authors contributed equally.

\*Correspondence authors.

Email: hywang@htu.edu.cn (H. W); liuzm@iccas.ac.cn (Z. L); jwang@htu.edu.cn (J. W)

### Table of Contents:

|                                        |     |
|----------------------------------------|-----|
| Section S1. Materials and Methods..... | S2  |
| Section S2. Figures S1 to S39.....     | S6  |
| Section S3. Tables S1 to S5.....       | S41 |
| Section S4. References.....            | S44 |

## 1. Supplementary Methods

### Chemicals and POPs synthesis

#### Chemicals

5,10,15,20-Tetrakis(4-aminophenyl)-21H,23H-porphyrin (TAPP, 97%, Alfa Aesar), 5,5',5''-(benzene-1,3,5-triyl)tripicolinaldehyde (TTPD, 97%, Alfa Aesar), acetonitrile (MeCN, 99%, Keshi),  $\text{MoCl}_5$  (99.6%, Aladdin), ethanol (99.7%, Keshi), triethanolamine (TEOA, 99%, Aladdin),  $\text{Cu}(\text{OAc})_2 \cdot \text{H}_2\text{O}$  (98%, Macklin), tris(2,2'-bipyridyl) ruthenium(II) chloride hexahydrate (98%, Macklin), 1,3,5-trimethylbenzene (98%, Aladdin),  $\text{Co}(\text{NO})_3 \cdot 6\text{H}_2\text{O}$  (98 %, Alfa Aesar), methanol (99%, Keshi), 1,4-dioxane (99.7%, Damas-beta),  $\text{Ni}(\text{OAc})_2 \cdot 4\text{H}_2\text{O}$  (99%, Macklin), tetrahydrofuran (THF, 99%, Deen reagent), 2,2'-bipyridine ( 99%, J&K Chemical),  $\text{Zn}(\text{NO})_3 \cdot 6\text{H}_2\text{O}$  (99%, Aladdin), and Nafion D520 dispersion solution (DuPont) were used as received. Ar gas (99.99 vol%) and  $\text{CO}_2$  gas (99.999 vol%,) were purchased from Xinxiang Yuxin Gas Manufacturing Co. Ltd.

#### Synthesis of Por-POP-Mo

Por-POP (10.00 mg),  $\text{MoCl}_5$  (30.00 mg, 0.11 mmol), and 2,2'-bipyridine (17.18 mg, 0.11 mmol) were added to acetonitrile solution under a nitrogen atmosphere. The reaction mixture was refluxed at 95 °C for 24 h. After centrifugation, the resultant powder was washed several times with acetonitrile and methanol successively to ensure the removal of residual metal ions. Finally, the product was dried at 80 °C under vacuum for 12 h. The content of Mo atom was 13.2 wt% as determined by inductively coupled plasma–mass spectrometry.

#### Materials characterization

Field emission scanning electron microscope (FESEM) images were obtained on JEOL JSM-6390L. Fourier transform infrared (FTIR) spectra were recorded on a Perking Elmer Spectrum 400F spectroscopy.  $\text{CO}_2$  adsorption isotherms were measured at 25 °C by using a Quantachrome Autosorb-iQ adsorption analyzer after degassing at 200 °C for 12 h. X-ray diffraction (XRD) patterns of all sample powders were measured by a X'Pert3 Powder Advance diffractometer with monochromatized

Cu K $\alpha$  radiation operating at 45 kV and 40 mA. Transmission electron microscope (TEM) images and energy-dispersive X-ray spectra (EDS) were acquired using a JEM-ARM300F electron microscope at 200 kV. The N<sub>2</sub> adsorption and desorption isotherms were determined at -196 °C by a Quantachrome Autosorb-iQ adsorption analyzer after degassing at 200 °C for 8 h. The Brunauer-Emmet-Teller (BET) and nonlocal density functional theory (NLDFIT) models were used to determine specific surface areas and pore size distributions. The inductively coupled plasma-mass spectrum (ICP-MS) of metal elements was recorded on the Agilent 7700 spectroscopy. Thermogravimetric analysis (TGA) was measured from 25 to 600 °C under N<sub>2</sub> atmosphere with a heating rate of 10 °C min<sup>-1</sup> using a NETZSCH STA449C thermal analyzer.

The steady-state photoluminescence (PL) spectra and PL decay spectra were measured by a FLS980 Fluorescence Spectrometer (UK). Electrochemical tests were performed by a CHI 660E electrochemical working station (Shanghai). Solid-state UV-vis diffuse reflectance spectra of the samples were collected on a Perkin Elmer Lambda 950 spectroscopy (USA) using BaSO<sub>4</sub> as the reference. X-ray photoelectron spectroscopy (XPS) analysis was performed using the Thermo Scientific K-Alpha electron energy spectrometer with Al K $\alpha$  (1486.6 eV) radiation as the X-ray excitation source and all XPS data were corrected by standard C 1s peak (284.6 eV). The quasi-in-situ XPS spectra were recorded using a Thermo Fisher SCIENTIFIC ESCALAB 250 (USA) spectrometer. X-ray absorption fine structure (XAFS) spectra (Cu K-edge and Mo K-edge) were collected at the 1W1B station in Beijing Synchrotron Radiation Facility (BSRF) operated at 2.5 GeV with a maximum current of 250 mA.

### **Photoelectrochemical measurements**

The photoelectrochemical measurements were carried out with a standard three-electrode system by a Gamry CHI 660E electrochemical workstation. For the three-electrode system, the saturated Ag/AgCl electrode, Pt mesh (1.0×1.0 cm<sup>2</sup>), and the photocatalysts modified indium tin oxide (ITO) glass were used as the reference electrode, counter electrode, and working electrode, respectively. For the preparation

of working electrode, 5.00 mg of the as-prepared photocatalyst and 15  $\mu\text{L}$  of Nafion solution were dispersed in 85  $\mu\text{L}$  ethanol, and sonicated for 30 min. Then, the 100  $\mu\text{L}$  photocatalyst colloid was spread evenly on the surface of ITO conductive glass ( $1.0 \times 1.0 \text{ cm}^2$ ). After drying in the air at room temperature, the working electrode was stored in petri dishes for related tests. The photoelectric test was carried out in 0.500 M aqueous sodium sulfate solution under light illumination or dark, and 300 W Xe lamp (cut 420 nm) was used as a light source. Mott-Schottky (M-S) plots were determined at the frequencies of 200, 500 and 800 Hz, respectively, and EIS measurements were performed in the frequency range from 10 kHz to 0.1 Hz.

### **Apparent quantum efficiency of $\text{C}_2\text{H}_6$**

The apparent quantum efficiency (AQE) was measured under the same photocatalytic reaction conditions irradiated by different wavelengths of light produced from bandpass filters (including 420, 450, 500, 520, 550, 600 and 630 nm) for 2h. The light intensity was detected by a Newport 91150-2000 optical power meter (USA Newport Corporation). The AQE values were calculated according to the below equation <sup>4, 5</sup>:

$$\begin{aligned} \text{AQE}(\%) &= (\text{number of reacted electrons} / \text{number of incident photons}) \times 100\% \\ &= ((n \times N_A \times h \times c) / (S \times P \times \lambda \times t)) \times 100\% \end{aligned} \quad (\text{S3})$$

where  $N_A$  is Avogadro's constant ( $6.022 \times 10^{23} \text{ mol}^{-1}$ ),  $n$  is the molar number of the  $\text{C}_2\text{H}_6$ ,  $h$  is the Planck's constant ( $6.63 \times 10^{-34} \text{ m}^2 \text{ kg s}^{-1}$ ),  $S$  is the irradiation area ( $\text{cm}^2$ ),  $c$  is the speed of light ( $3 \times 10^8 \text{ m s}^{-1}$ ),  $P$  is irradiation intensity ( $\text{W cm}^{-2}$ ),  $\lambda$  is the wavelength of the light source, and  $t$  is irradiation time (s), respectively. Note that the apparent quantum efficiency calculations described above did not consider the catalyst amount and the transparency of the photocatalytic reactor.

### **Computational Methods**

The DFT calculations were performed using the Vienna ab initio simulation package (VASP). The generalized gradient approximation (GGA) with the Perdew–Burke–Emzerhof (PBE) functional <sup>6</sup> was employed to describe the exchange correlation energy. Projector augmented wave (PAW) methods <sup>7</sup> were used for the

pseudopotentials. The energy cutoff for the plane wave basis was set to be 500 eV, and the convergence criterion of geometry relaxation was 0.02 eV/Å in force. For geometric optimization, the energy convergence criterion was set to  $1 \times 10^{-5}$  eV. Meanwhile, the electronic structures of the optimized structures along reaction pathway were also calculated through Gaussian 09 program, where the (U)PBE1PBE hybrid functional<sup>8</sup> was adopted, and the 6-311G\*\* basis set was used for C, H, O and N atoms, the Lanl2DZ basis set was used for Cu and Mo atoms. The free energy diagram for the CO<sub>2</sub> photoreduction pathway was calculated through the VASPKIT tool based on the equation ( $\Delta G = \Delta E + \Delta \text{EZPE} - T\Delta S$ ), where  $\Delta E$ ,  $\Delta \text{EZPE}$ , and  $T\Delta S$  represent the calculated electronic energy, zero-point energy, and entropy contribution, respectively.

## 2. Supplementary Figures 1-39

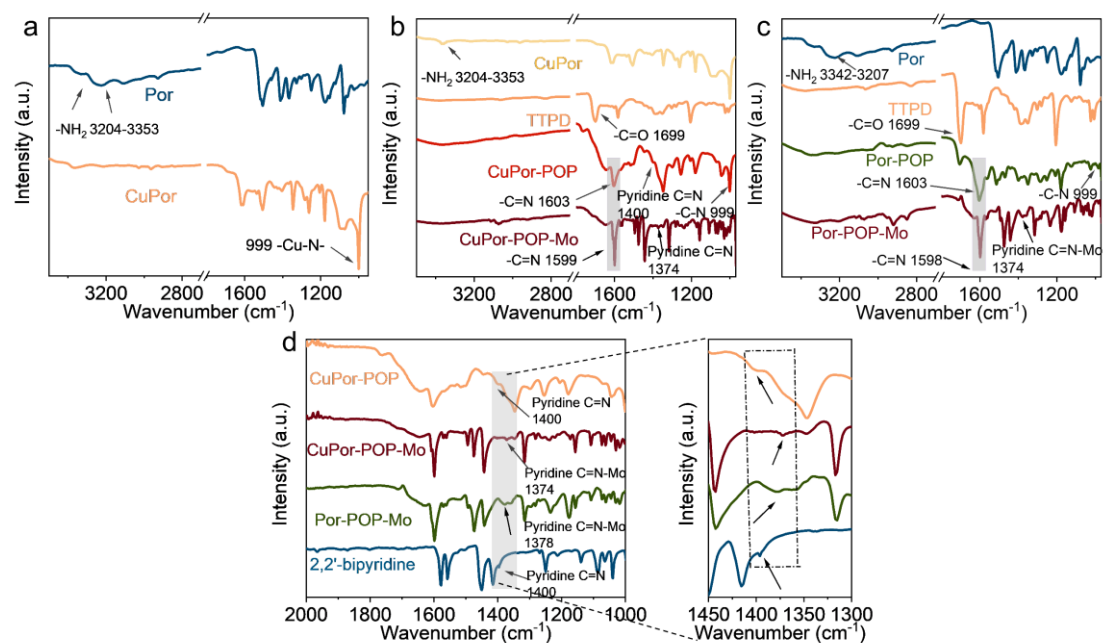

**Supplementary Figure 1 FTIR spectra.** **a** CuPor. **b** CuPor-POP and CuPor-POP-Mo. **c** Por-POP and Por-POP-Mo. **d** 2,2'-bipyridine and POPs.

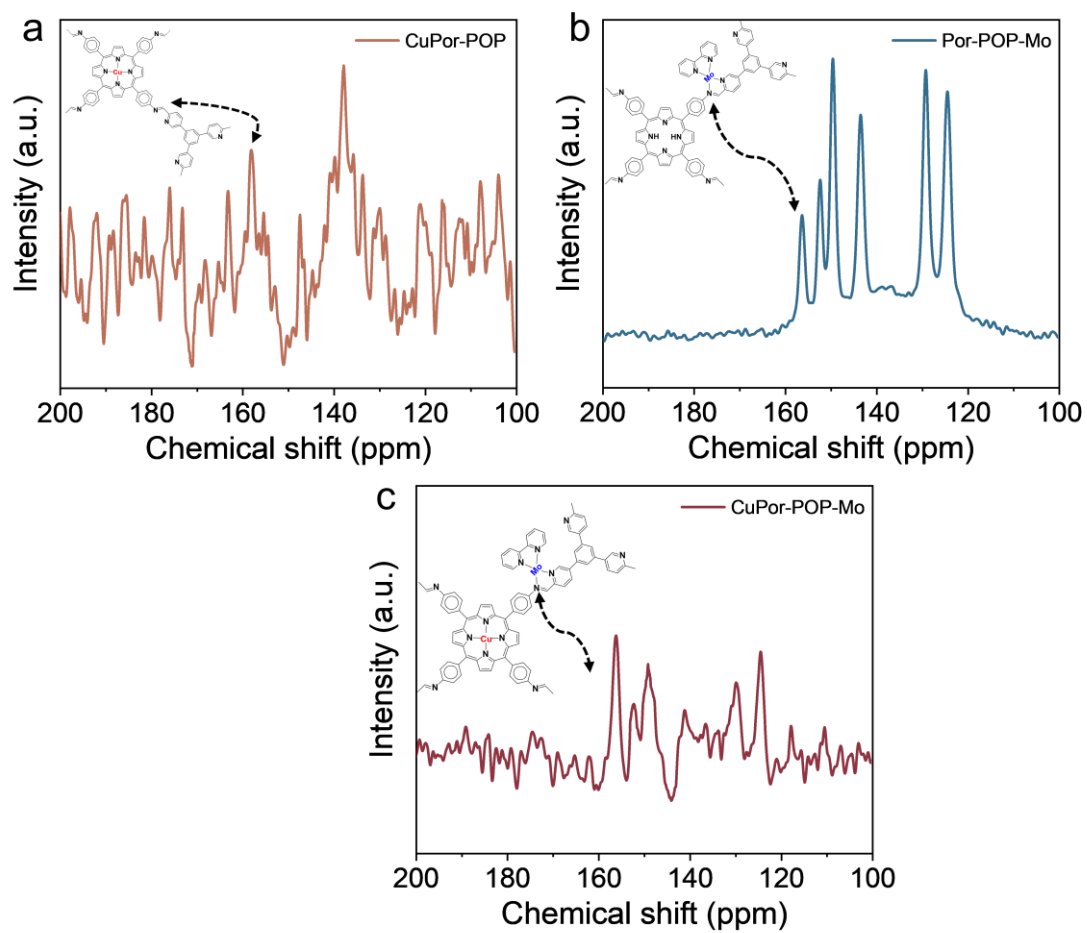

**Supplementary Figure 2 Solid state  $^{13}\text{C}$  NMR spectra. a CuPor-POP. b Por-POP-Mo. c CuPor-POP-Mo.**

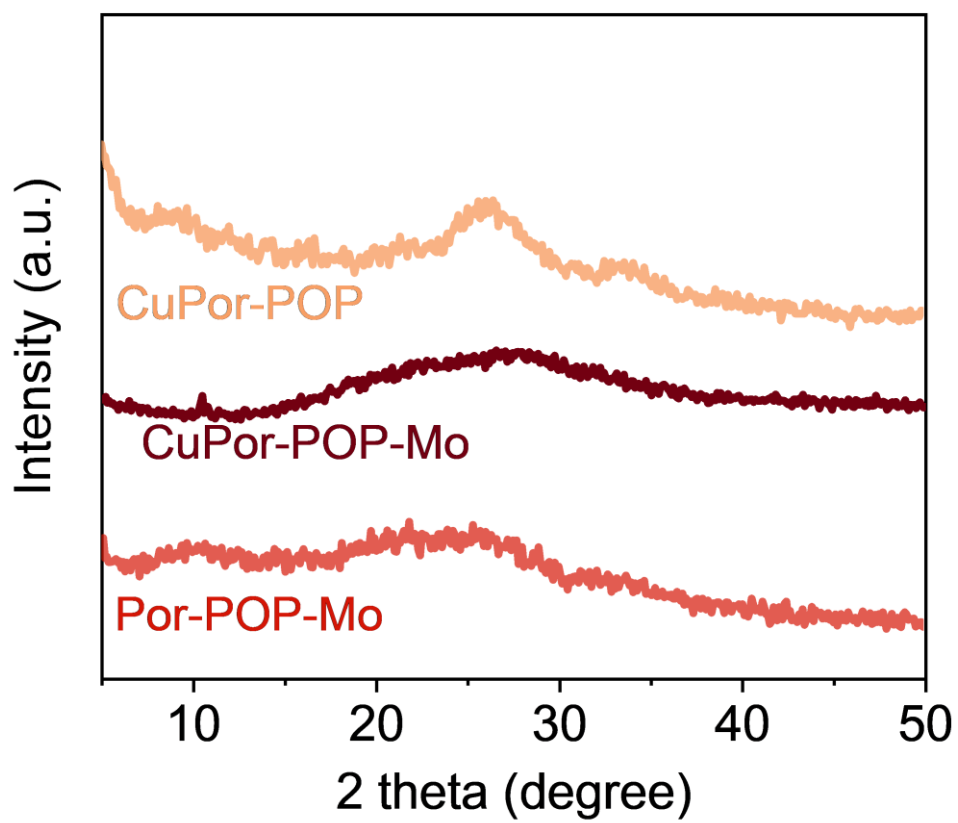

**Supplementary Figure 3 PXRD.** Powder XRD patterns of CuPor-POP, Por-POP-Mo and CuPor-POP-Mo.



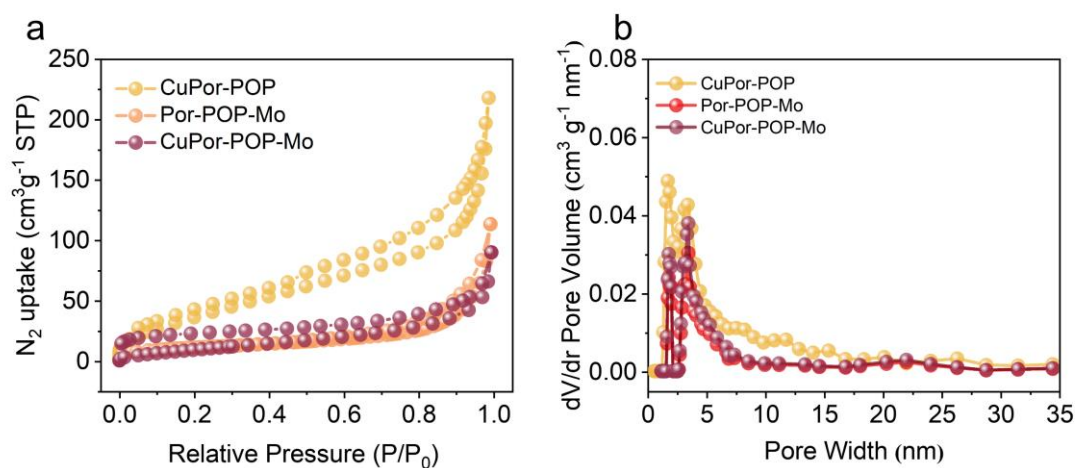

**Supplementary Figure 4** Calculated non-local density functional theory (NLDFT) model for CuPor-POP, Por-POP-Mo, and CuPor-POP-Mo. **a** N<sub>2</sub> adsorption-desorption isotherms. **b** Pore size distribution.

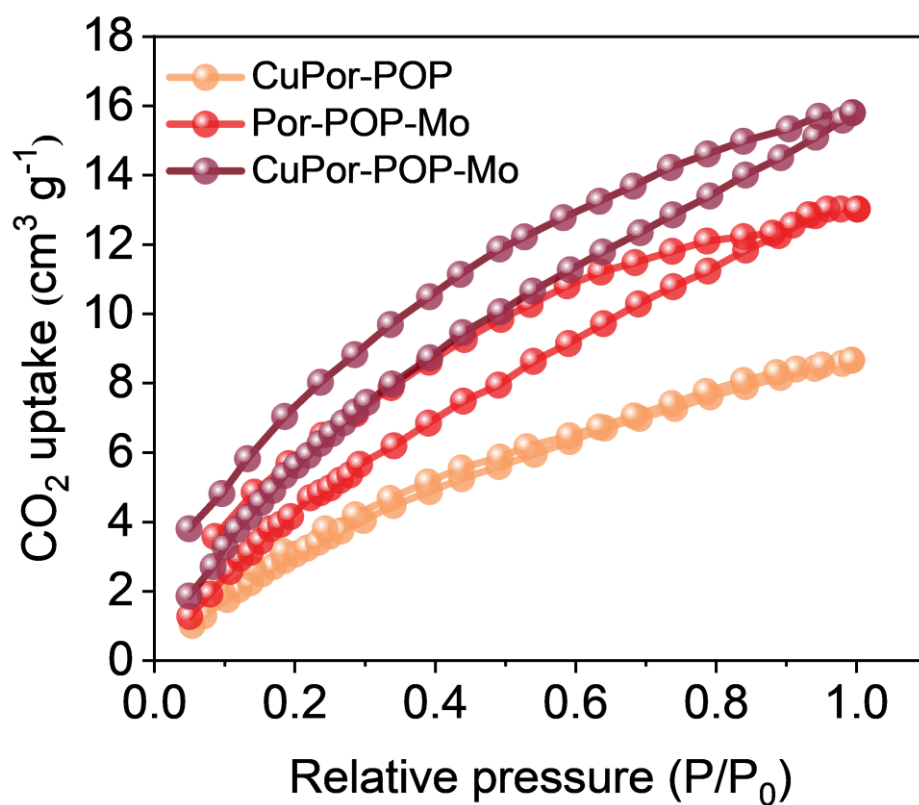

**Supplementary Figure 5 CO<sub>2</sub> adsorption of all the POPs.** CO<sub>2</sub> adsorption capacity of CuPor-POP, Por-POP-Mo, and CuPor-POP-Mo at 25 °C.

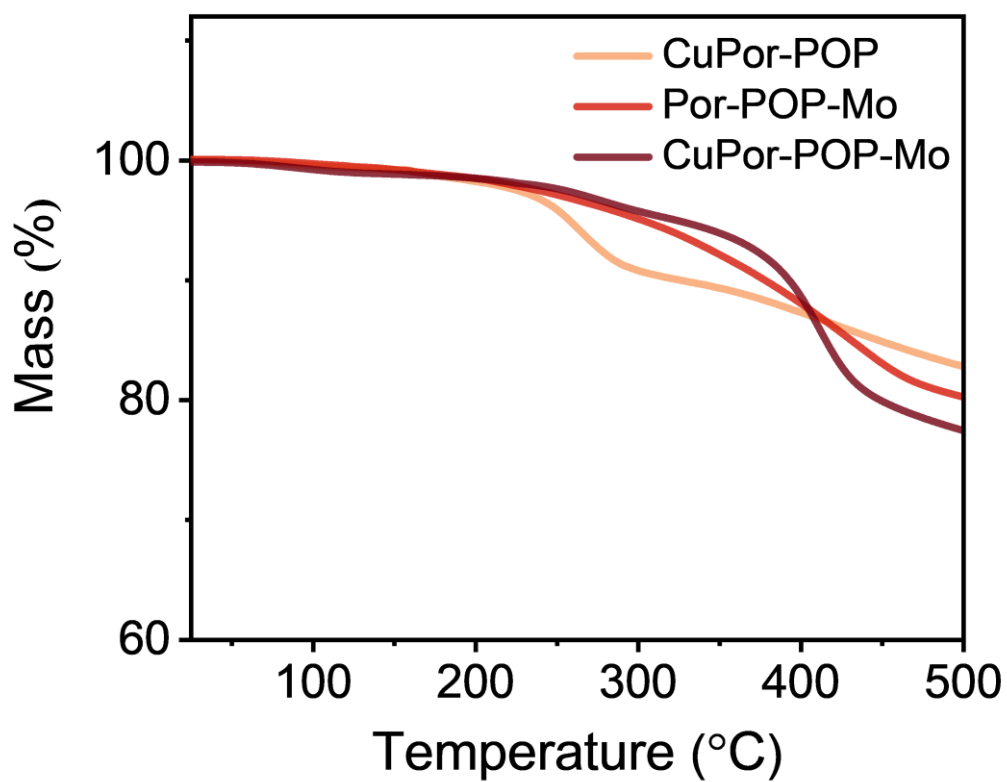

**Supplementary Figure 6 TGA.** TGA curves of all the samples under the Argon gas.

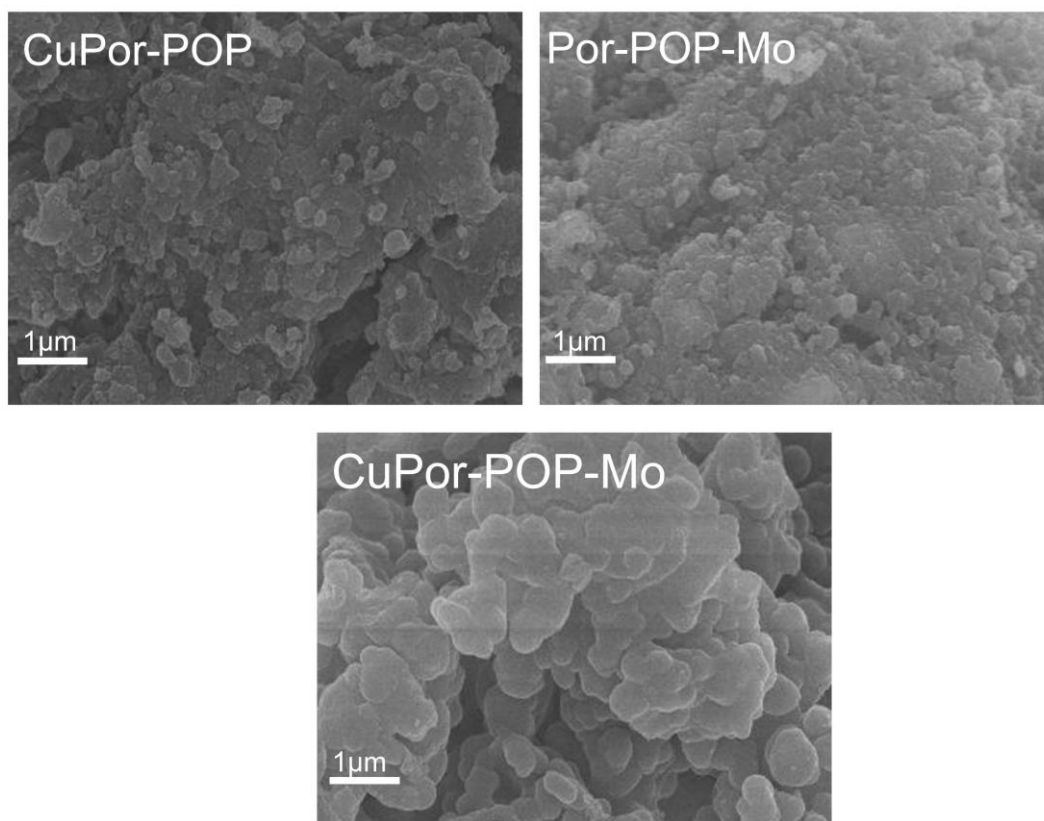

**Supplementary Figure 7 SEM images.** SEM images of CuPor-POP, Por-POP-Mo, and CuPor-POP-Mo.

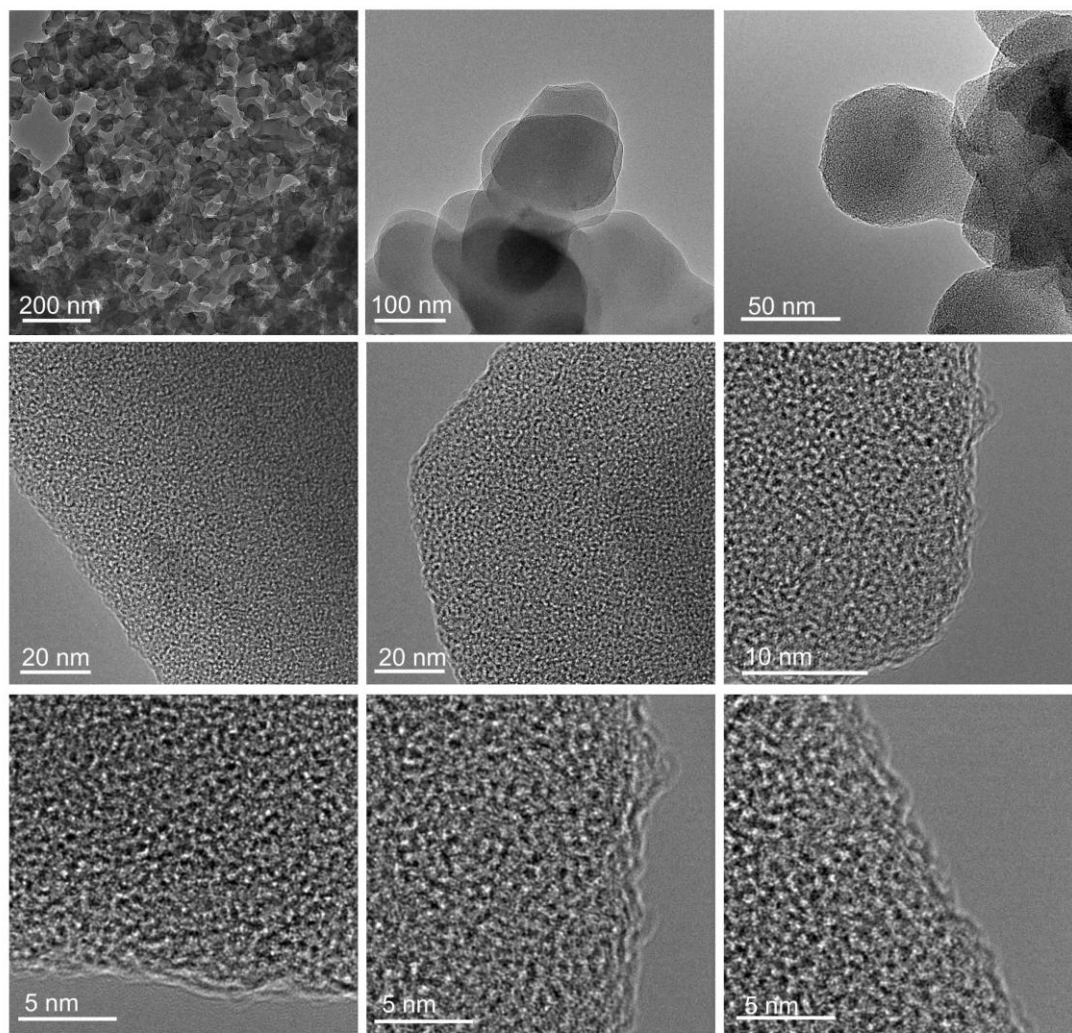

**Supplementary Figure 8 TEM images.** TEM images of CuPor-POP-Mo.

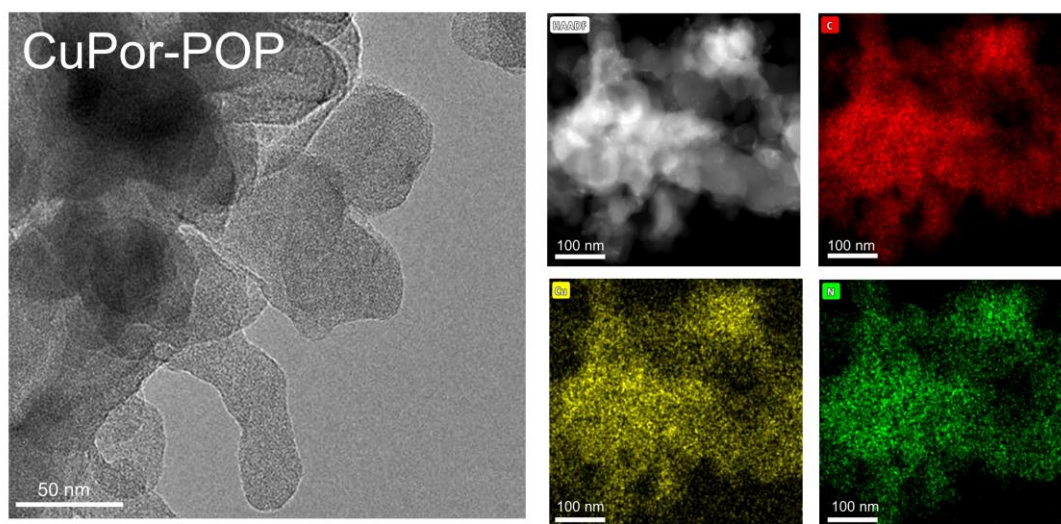

**Supplementary Figure 9 TEM images and energy-dispersive X-ray spectrum (EDS) mapping of CuPor-POP.** Carbon mapped in red, Nitrogen mapped in green and copper mapped in yellow.

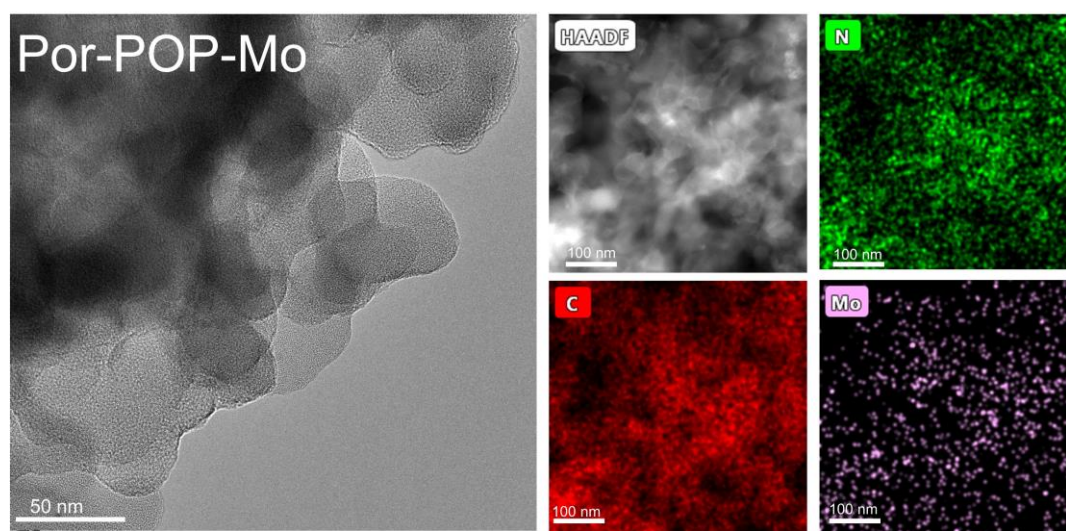

**Supplementary Figure 10 TEM images and energy-dispersive X-ray spectrum (EDS) mapping of Por-POP-Mo.** Nitrogen mapped in green, carbon mapped in red and molybdenum mapped in purple.



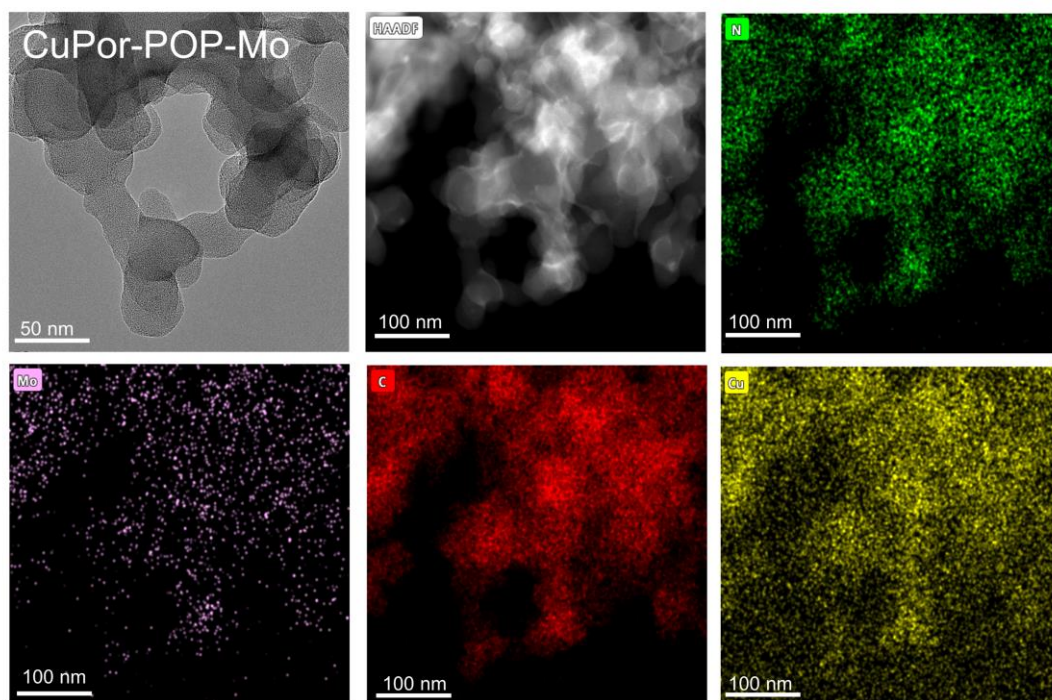

**Supplementary Figure 11 TEM images and energy-dispersive X-ray spectrum (EDS) mapping of CuPor-POP-Mo.** Nitrogen mapped in green, molybdenum mapped in purple, carbon mapped in red and copper mapped in yellow.

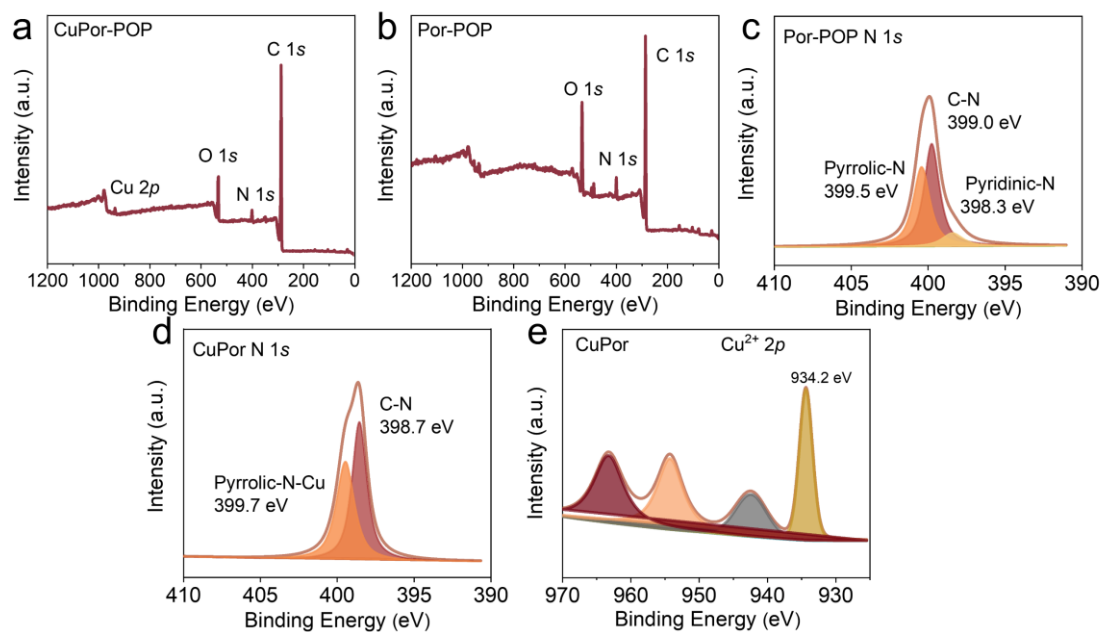

**Supplementary Figure 12 XPS survey spectrum for CuPor-POP, Por-POP and CuPor.** **a-b** XPS survey spectrum for CuPor-POP and Por-POP. **c** High-resolution XPS spectrum for N 1s of Por-POP. **d-e** High-resolution XPS spectrum for N 1s and Cu 2p of CuPor.



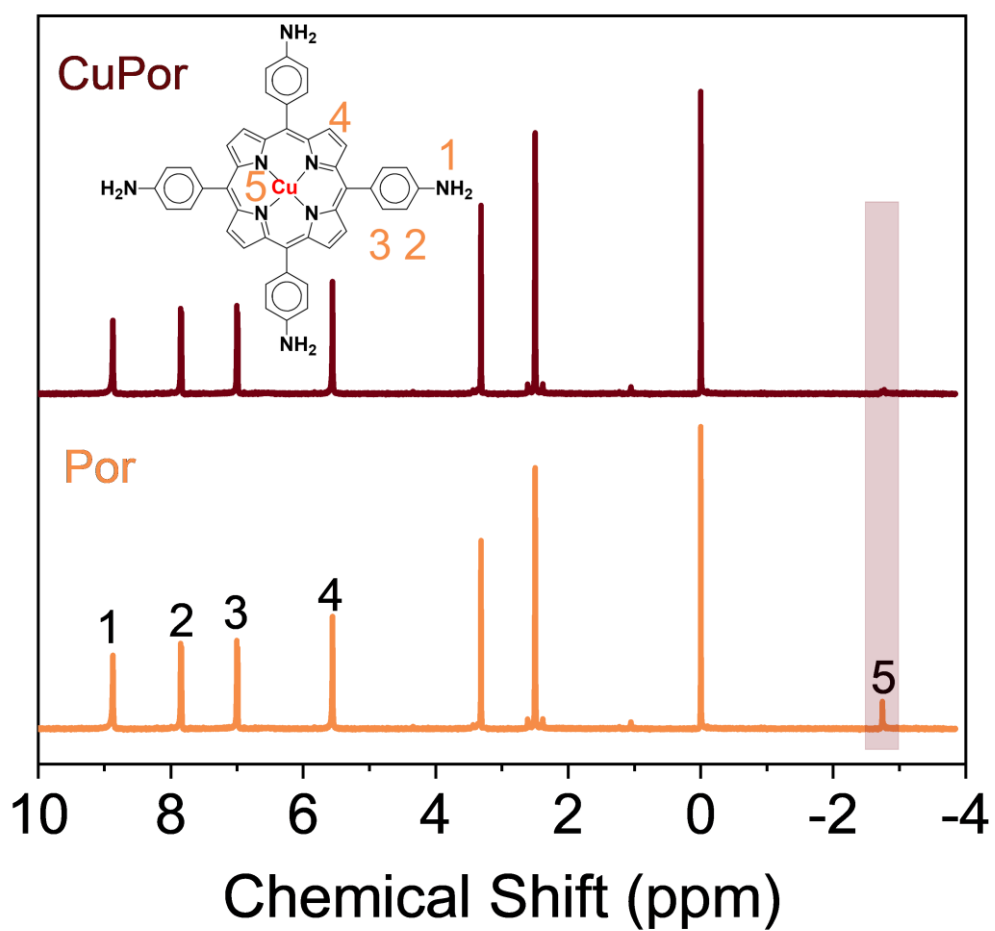

**Supplementary Figure 13  $^1\text{H}$  NMR spectrum.**  $^1\text{H}$  NMR spectrum of Por and CuPor.

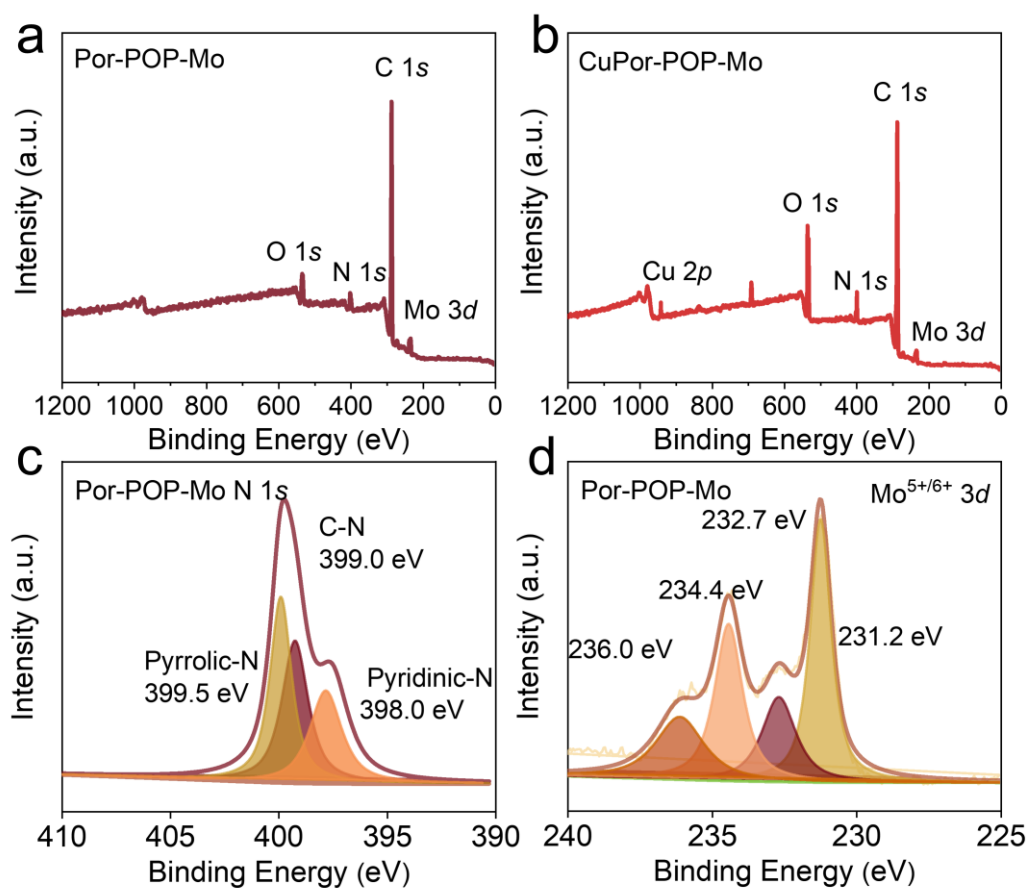

**Supplementary Figure 14 XPS survey spectrum for Por-POP-Mo and CuPor-POP-Mo. a-b** XPS survey spectrum for Por-POP-Mo and CuPor-POP-Mo. **c-d** High-resolution XPS spectrum c of N 1s, and d of Mo 3d for Por-POP-Mo.

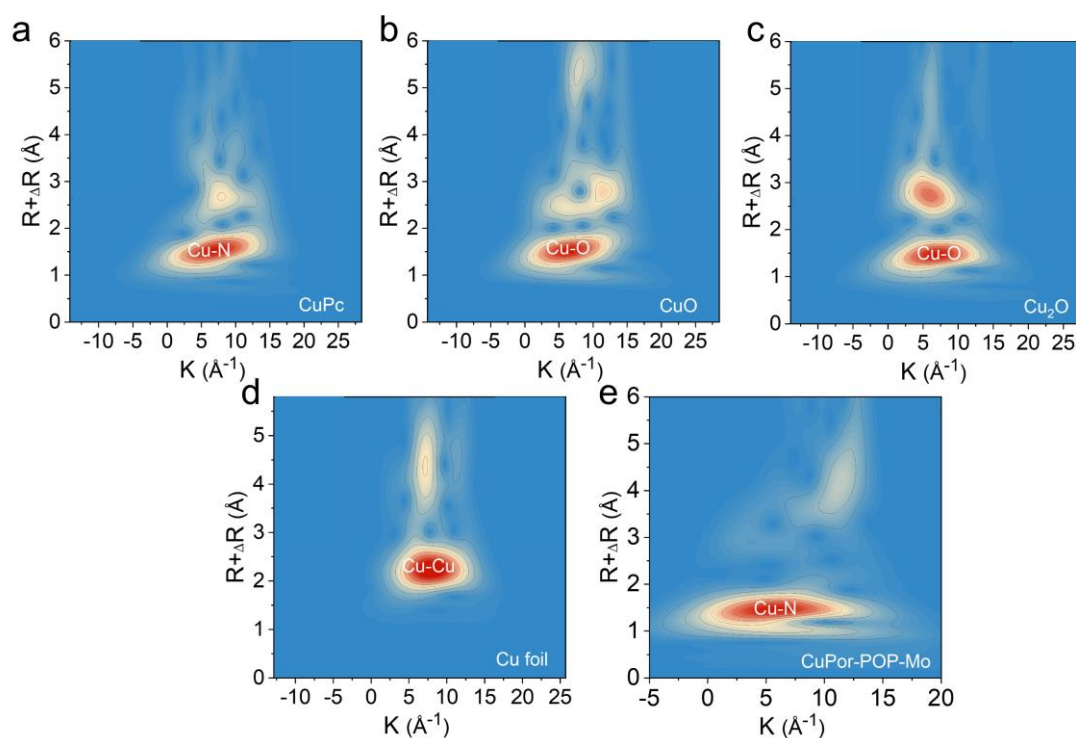

**Supplementary Figure 15 WT-EXAFS spectrum in discriminating radial distance and k-space resolution of CuPor-POP-Mo. a CuPc. b CuO. c Cu<sub>2</sub>O. d Cu foil. e CuPor-POP-Mo.**

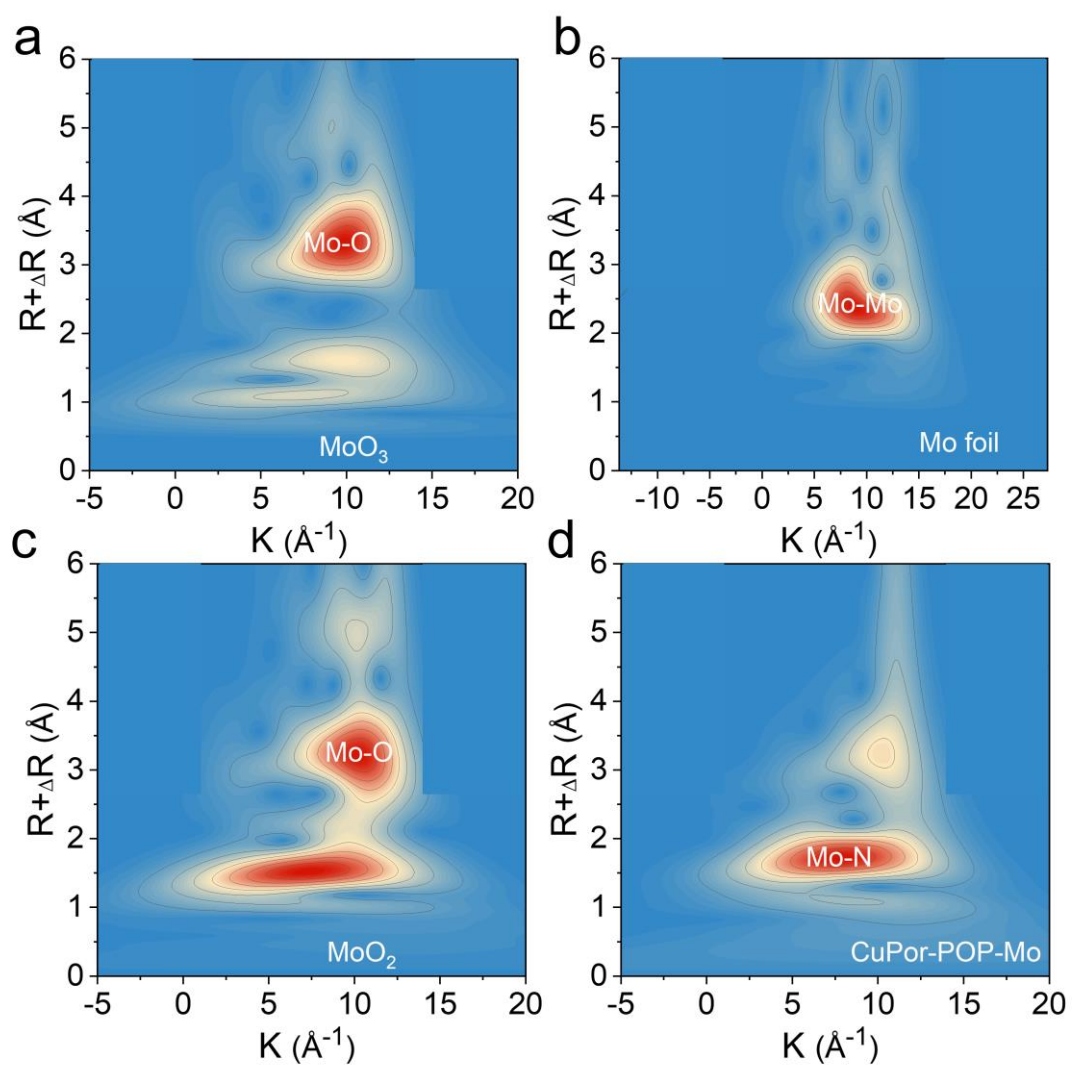

**Supplementary Figure 16 WT-EXAFS spectra in discriminating radial distance and k-space resolution of the standard sample. a  $\text{MoO}_3$ . b Mo foil. c  $\text{MoO}_2$ . d CuPor-POP-Mo.**

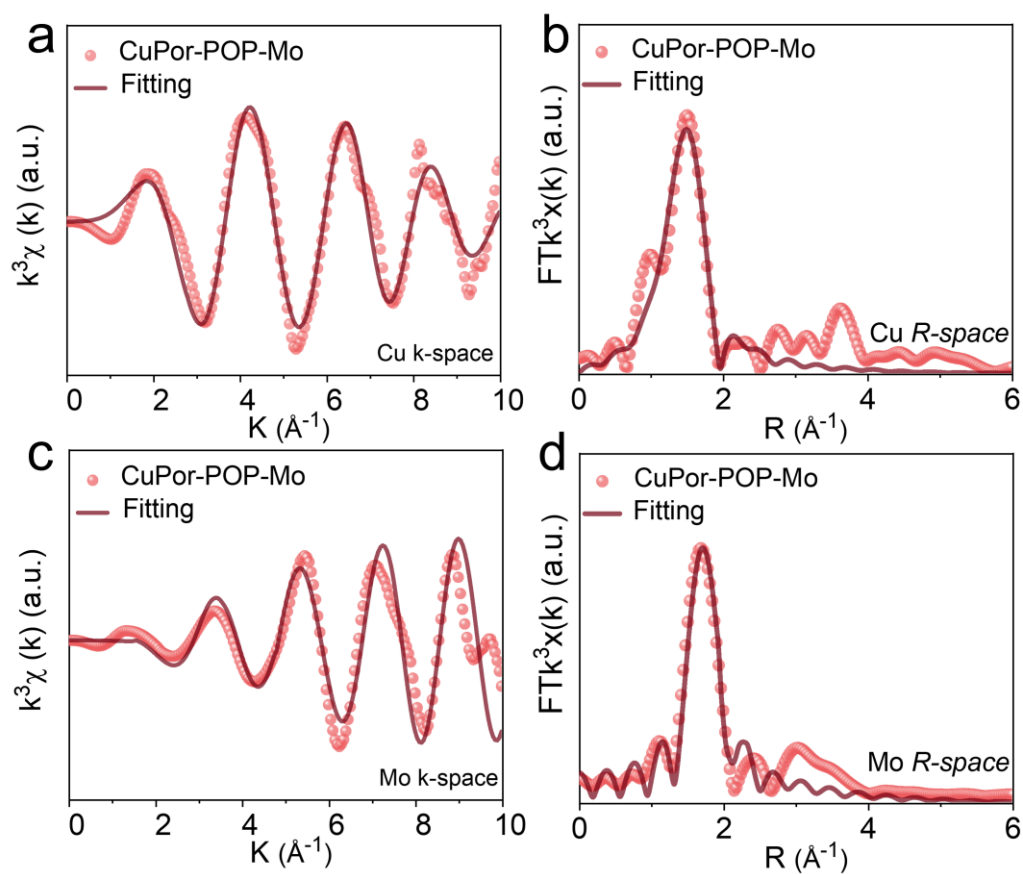

**Supplementary Figure 17 EXFAS fitting curves for CuPor-POP-Mo. a** in Cu k-space. **b** in Cu R-space. **c** in Mo k-space. **d** in Mo R-space.

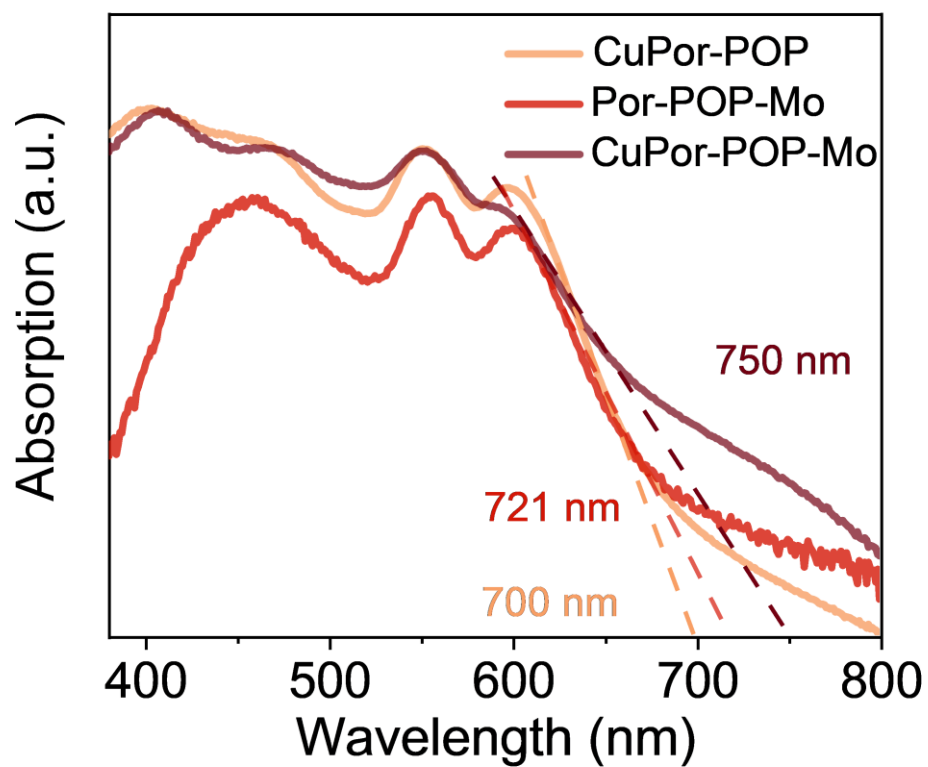

**Supplementary Figure 18 Solid-state UV-vis diffuse reflectance spectra.** Solid-state UV-vis diffuse reflectance spectra of CuPor-POP, Por-POP-Mo and CuPor-POP-Mo.

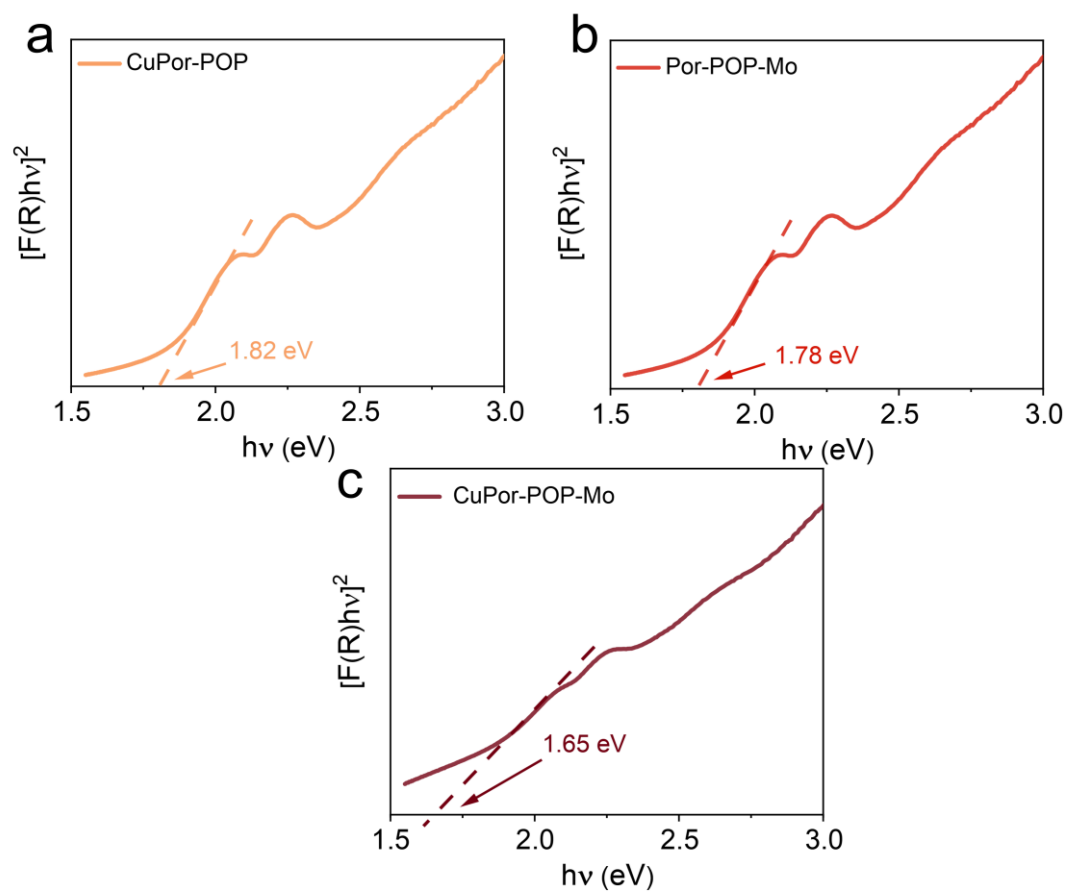

**Supplementary Figure 19 Tauc plots of all the samples derived from solid-state UV-vis diffuse reflectance spectra in Supplementary Figure 18. a CuPor-POP. b Por-POP-Mo. c CuPor-POP-Mo.**

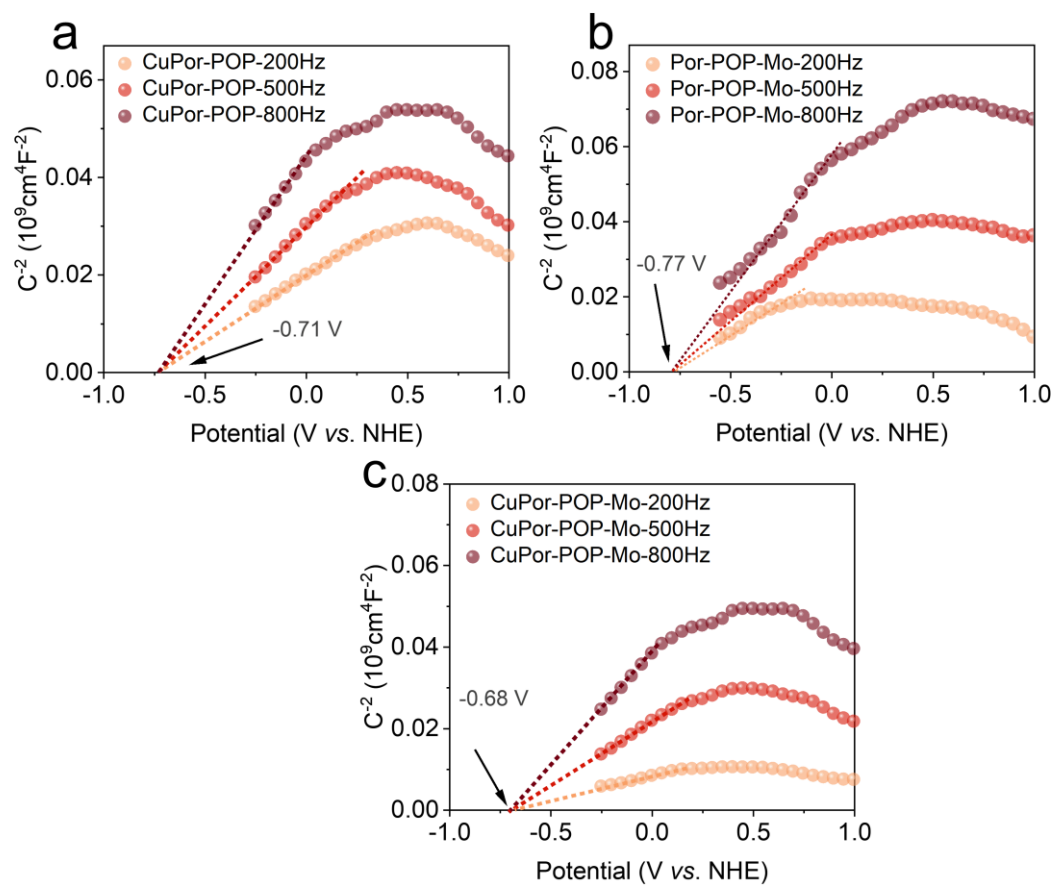

**Supplementary Figure 20 Mott-Schottky plots at different frequencies (200, 500, and 800 Hz). a CuPor-POP. b Por-POP-Mo. c CuPor-POP-Mo.**



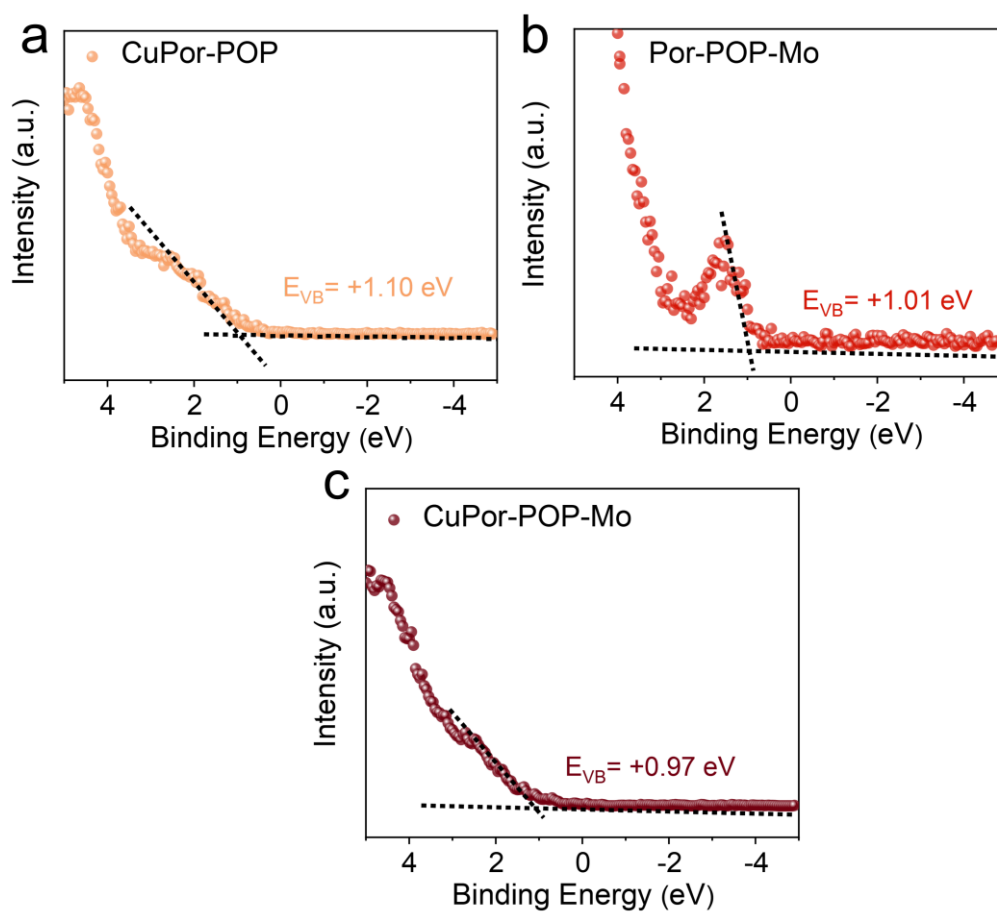

**Supplementary Figure 21 XPS valence band spectra. a CuPor-POP. b Por-POP-Mo. c CuPor-POP-Mo.**

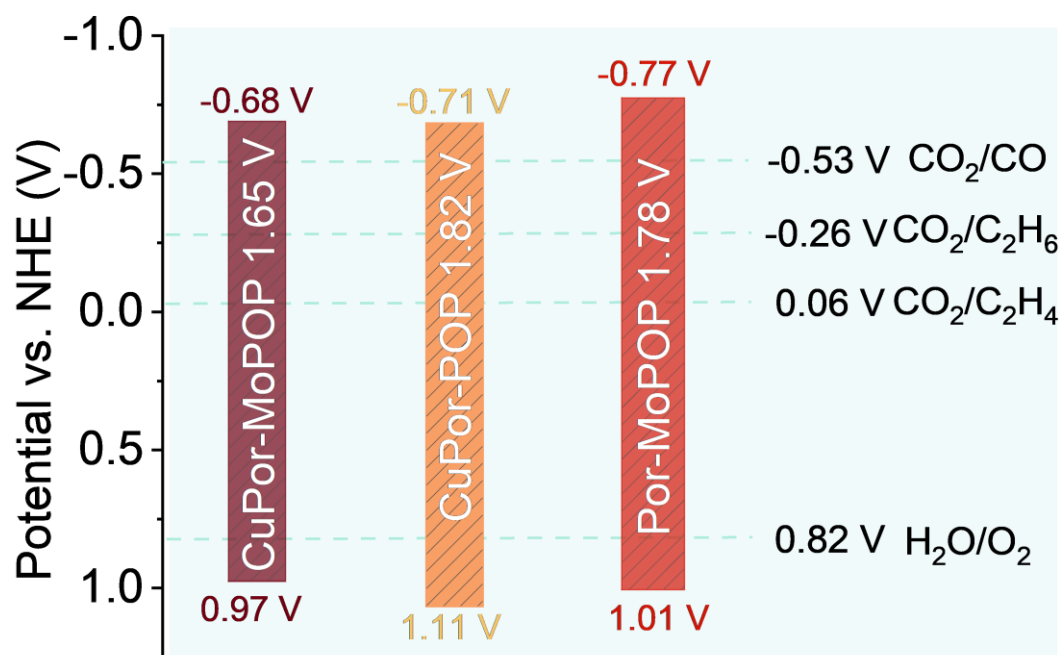

**Supplementary Figure 22 Band structures.** Band structures of CuPor-POP, Por-POP-Mo and CuPor-POP-Mo for  $\text{CO}_2$  photoreduction.

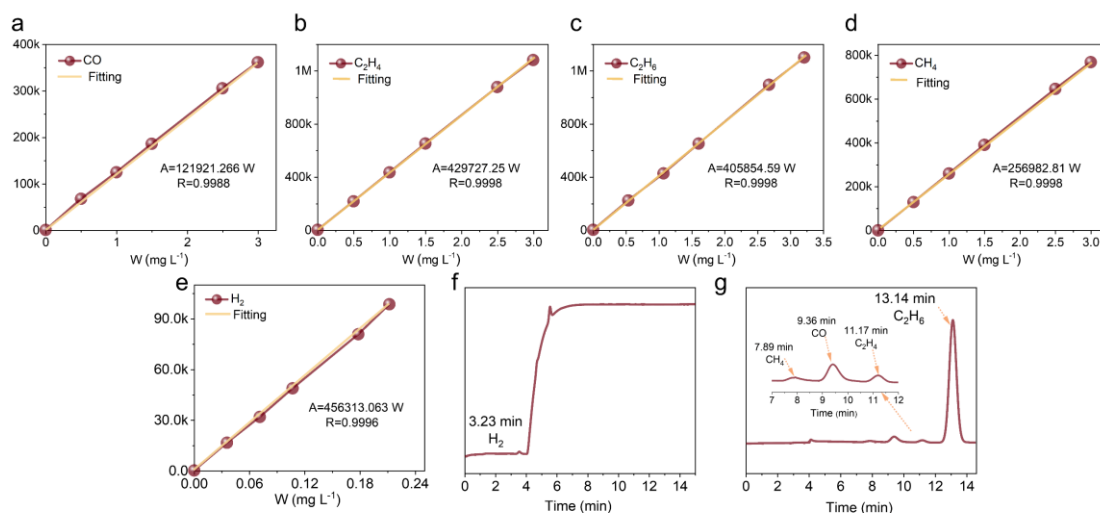

**Supplementary Figure 23 GC analysis.** Linear GC calibration plots **a** CO. **b** C<sub>2</sub>H<sub>4</sub>. **c** C<sub>2</sub>H<sub>6</sub>. **d** CH<sub>4</sub>. **e** H<sub>2</sub>. The corresponding retention time based on the GC profile of the CuPor-POP-Mo: **f** H<sub>2</sub> and **g** CO and hydrocarbon.

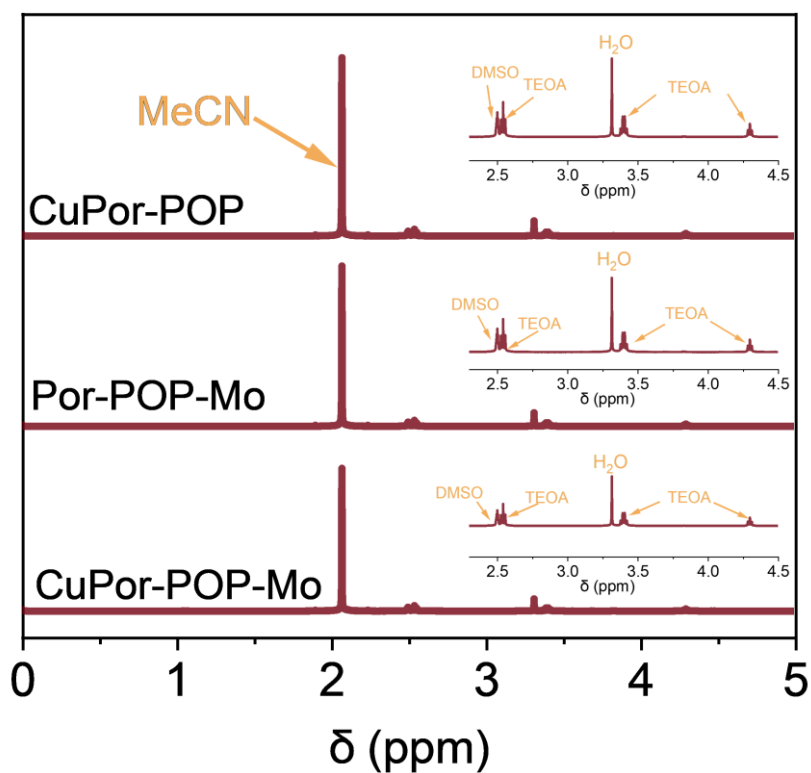

**Supplementary Figure 24 <sup>1</sup>H-NMR spectra of POPs in the liquid products after 4 h.** d<sup>6</sup>-DMSO was used as the internal standard.

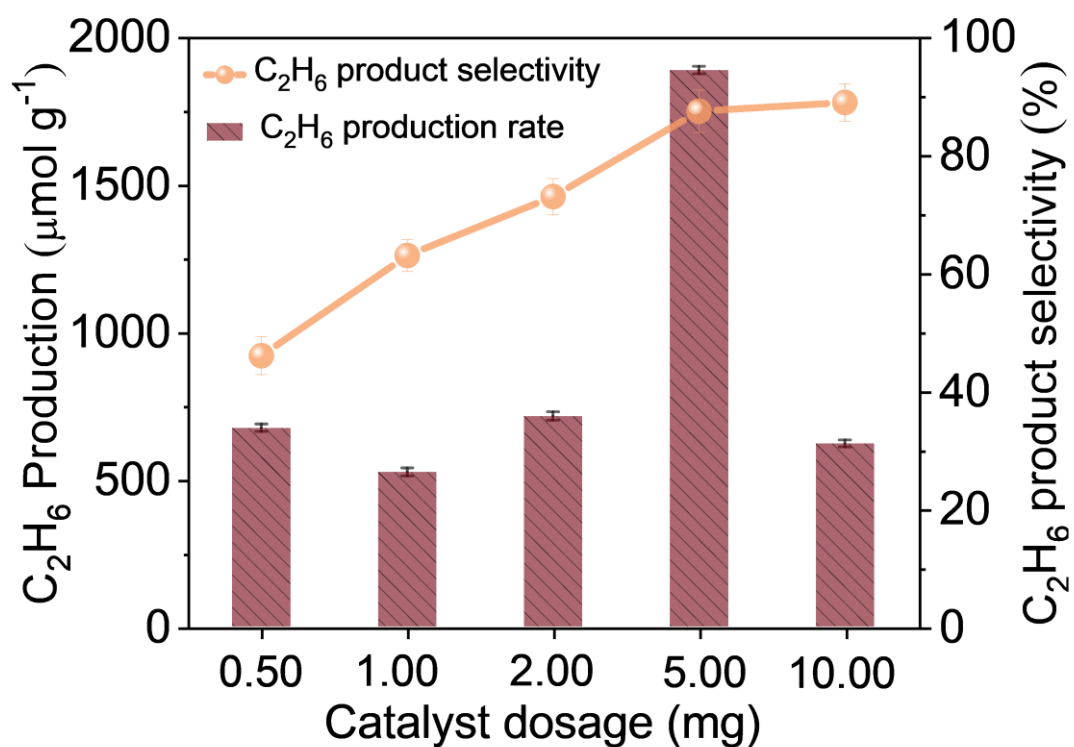

**Supplementary Figure 25 Dependence of catalyst mass-loading on photocatalytic C<sub>2</sub>H<sub>6</sub> production within 4 h.** The error bars for C<sub>2</sub>H<sub>6</sub> evolution uncertainty represent the standard deviation based on three independent measurements of each sample.

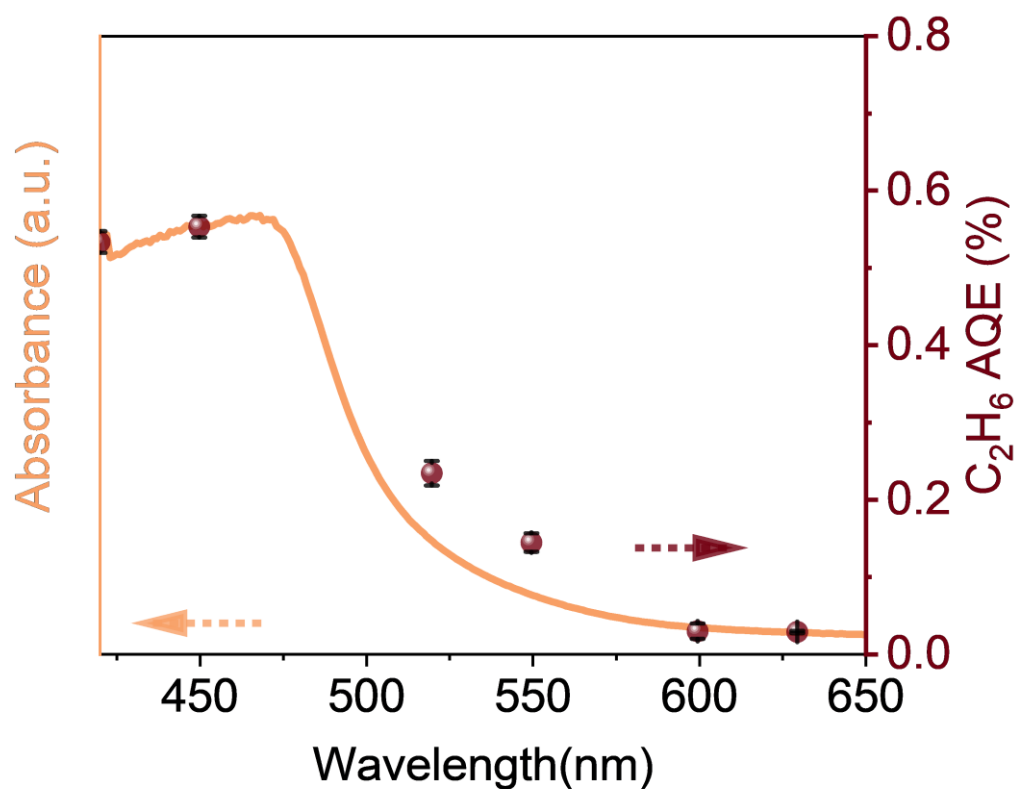

**Supplementary Figure 26 AQE of C<sub>2</sub>H<sub>6</sub> production catalyzed by CuPor-POP-Mo at different wavelengths and the related visible spectrum.** The error bars for C<sub>2</sub>H<sub>6</sub> evolution uncertainty represent the standard deviation based on three independent measurements of each sample.

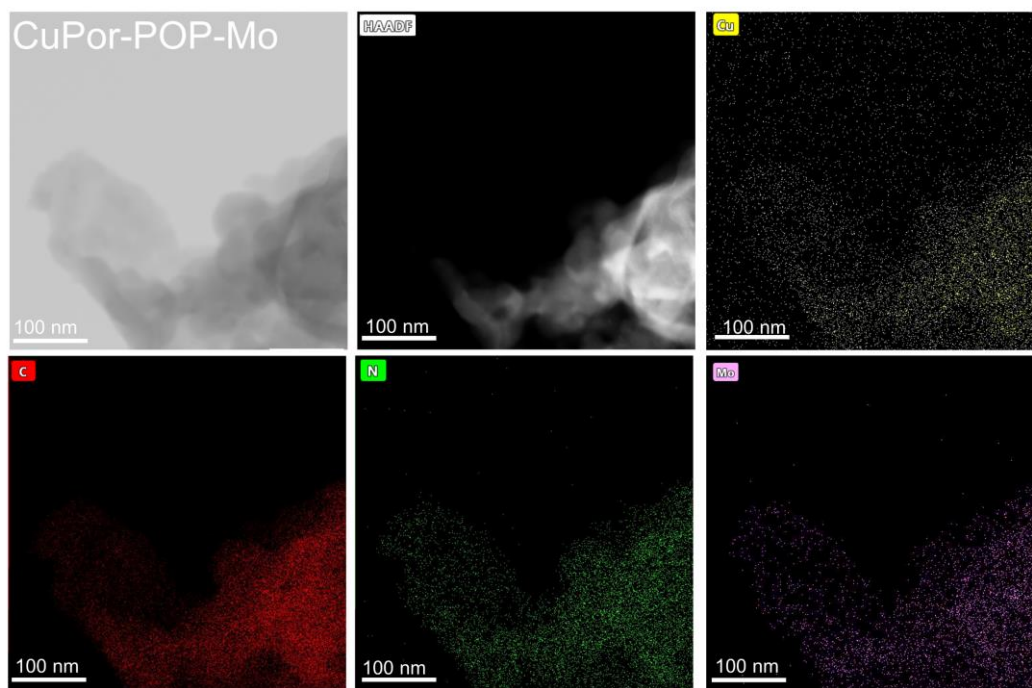

**Supplementary Figure 27 TEM images and corresponding elemental mapping after photocatalysis.** TEM images and corresponding elemental mapping of CuPor-POP-Mo after the 4<sup>th</sup> cycle of the photocatalytic tests.

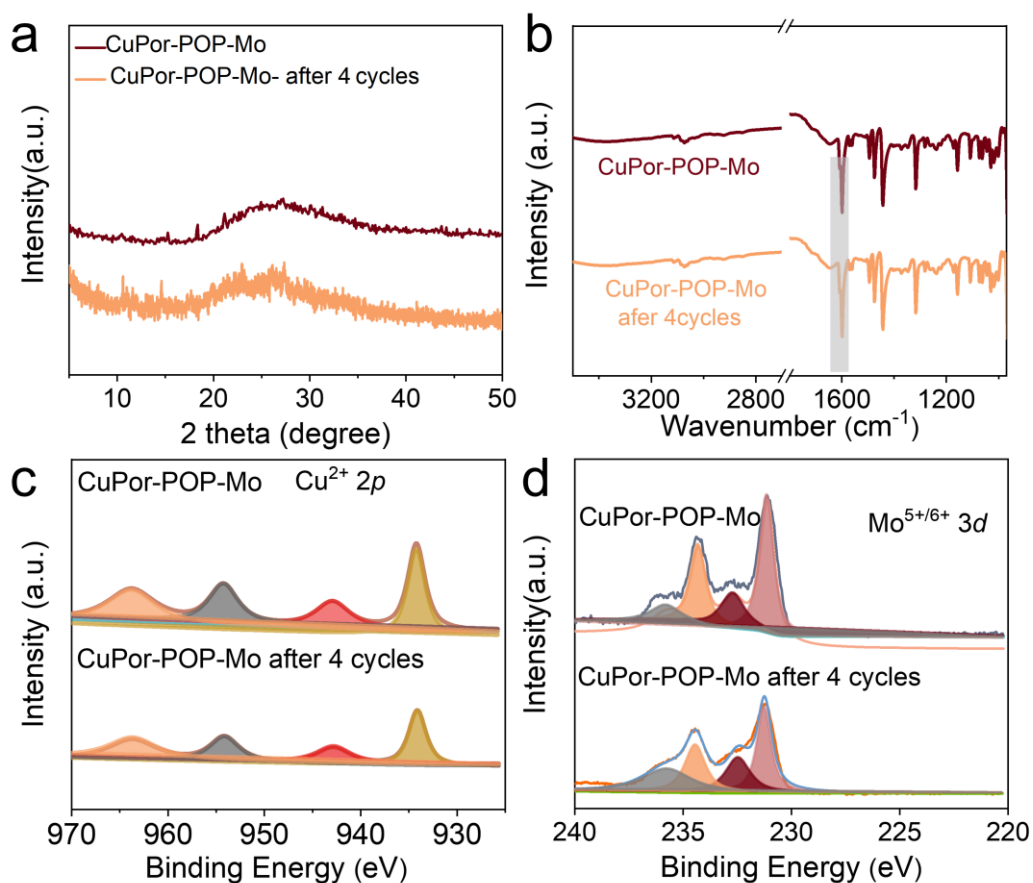

**Supplementary Figure 28 Chemical stability of CuPor-POP-Mo before and after 4 cycles CO<sub>2</sub> photoreduction process.** **a** XRD patterns. **b** FTIR spectra. **c-d** High-resolution XPS spectra of CuPor-POP-Mo before and after 4 cycles of the CO<sub>2</sub> photoreduction process.

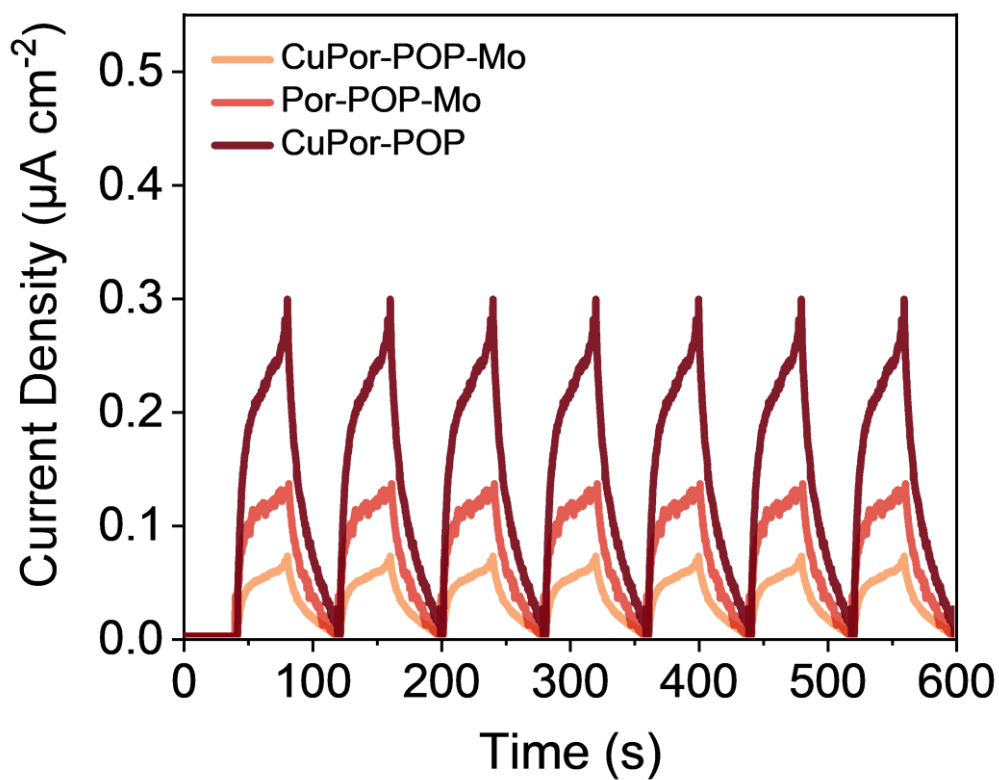

**Supplementary Figure 29 Photoresponsive current density analyst.** Transient photocurrent density under Xenon lamp ( $\geq 420$  nm) irradiation for all the samples.



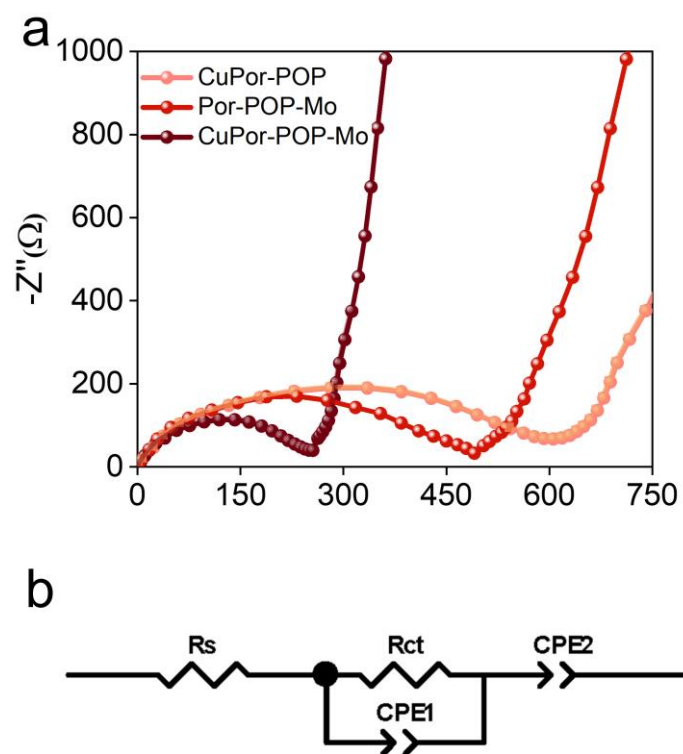

**Supplementary Figure 30** Nyquist plots of all the samples based on electrochemical impedance spectroscopy (EIS) measurements. **a** CuPor-POP, Por-POP-Mo and CuPor-POP-Mo. **b** The related equivalent circuit.

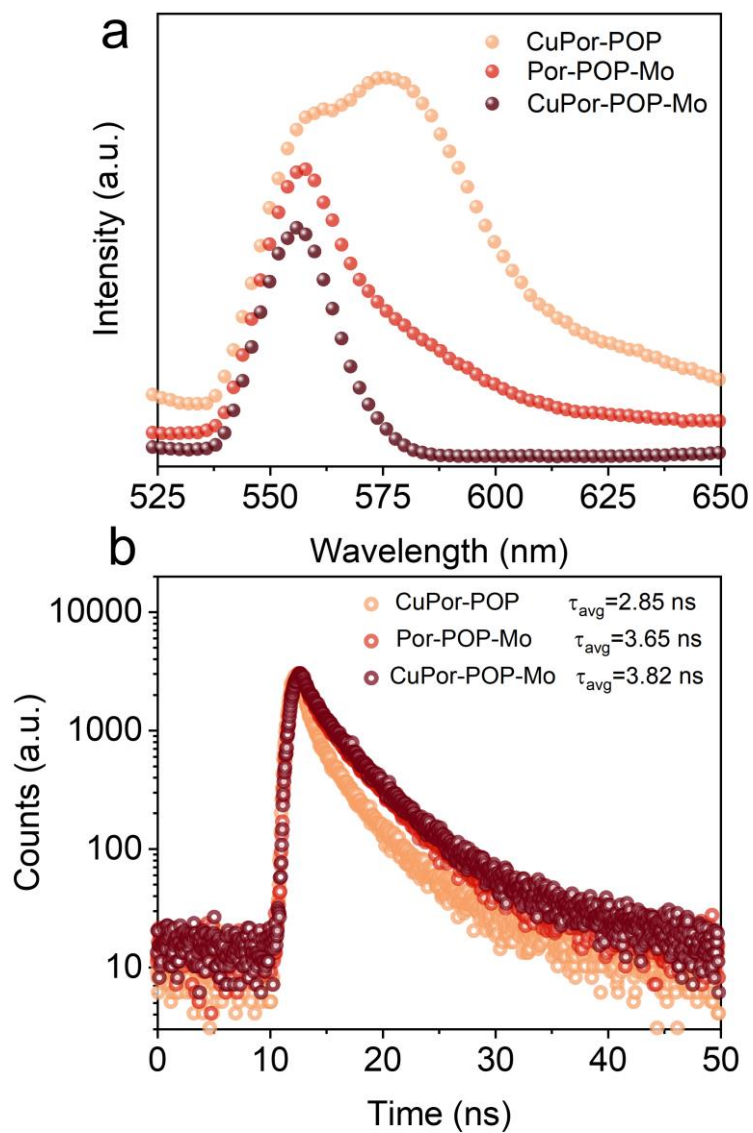

**Supplementary Figure 31 Steady-state PL spectra and PL decay spectra of all samples. a** Steady-state PL spectra of CuPor-POP, Por-POP-Mo and CuPor-POP-Mo. **b** PL decay spectra of CuPor-POP, Por-POP-Mo and CuPor-POP-Mo.

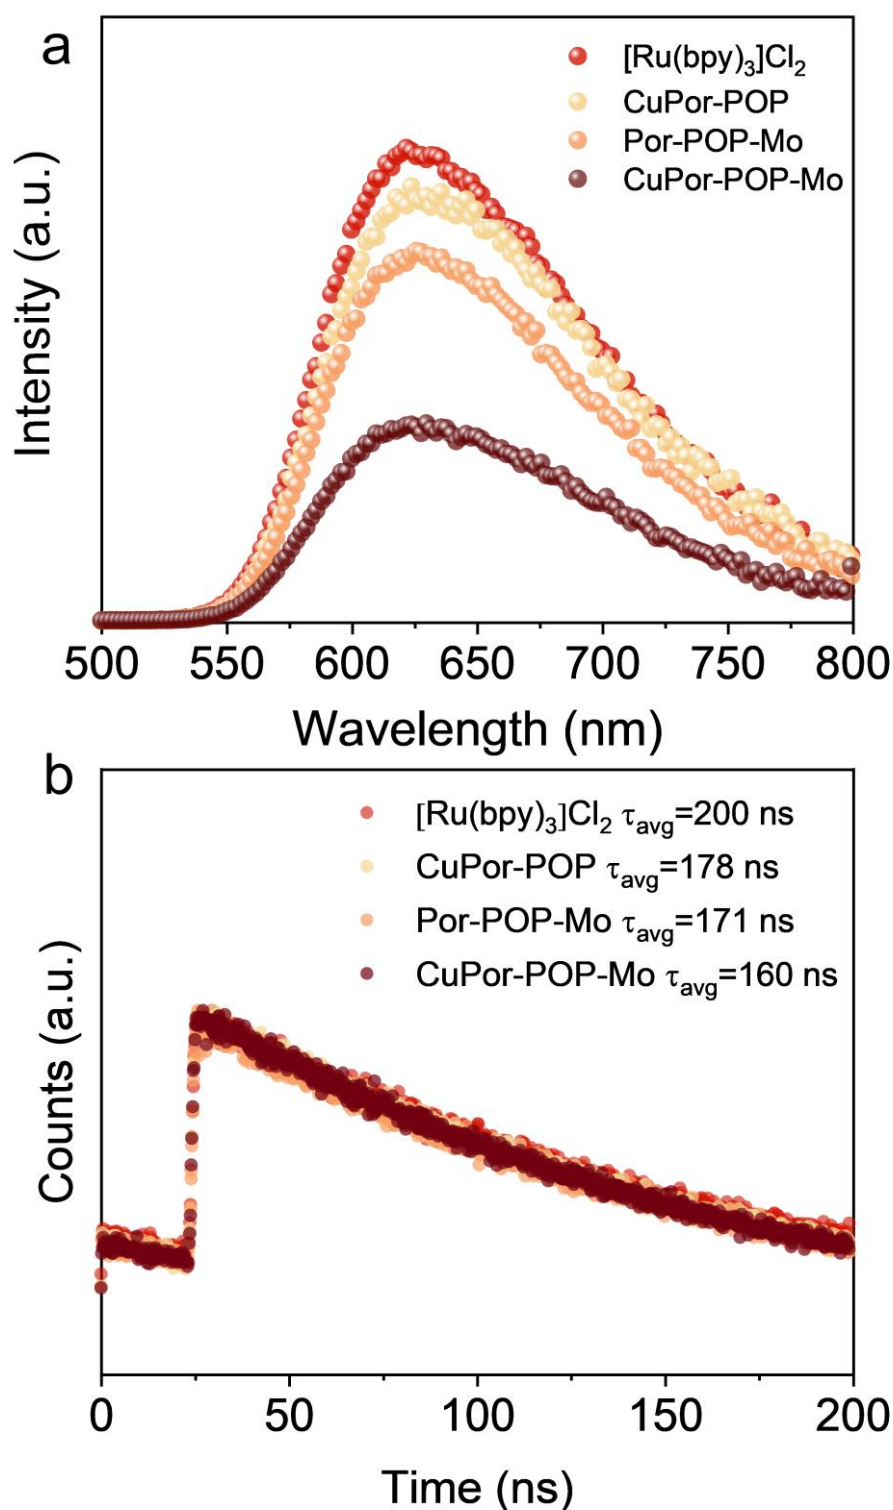

**Supplementary Figure 32 Steady-state PL spectra and PL decay spectra of all sample in reaction system. a** Steady-state PL spectra of [Ru(bpy)<sub>3</sub>]Cl<sub>2</sub> (red), CuPor-POP+[Ru(bpy)<sub>3</sub>]Cl<sub>2</sub> (yellow), Por-POP-Mo+[Ru(bpy)<sub>3</sub>]Cl<sub>2</sub> (orange) and CuPor-POP-Mo+[Ru(bpy)<sub>3</sub>]Cl<sub>2</sub> (dark red). **b** Steady-state PL decay spectra of [Ru(bpy)<sub>3</sub>]Cl<sub>2</sub> with (CuPor-POP, Por-POP-Mo or CuPor-POP-Mo) and without catalyst (only [Ru(bpy)<sub>3</sub>]Cl<sub>2</sub>).

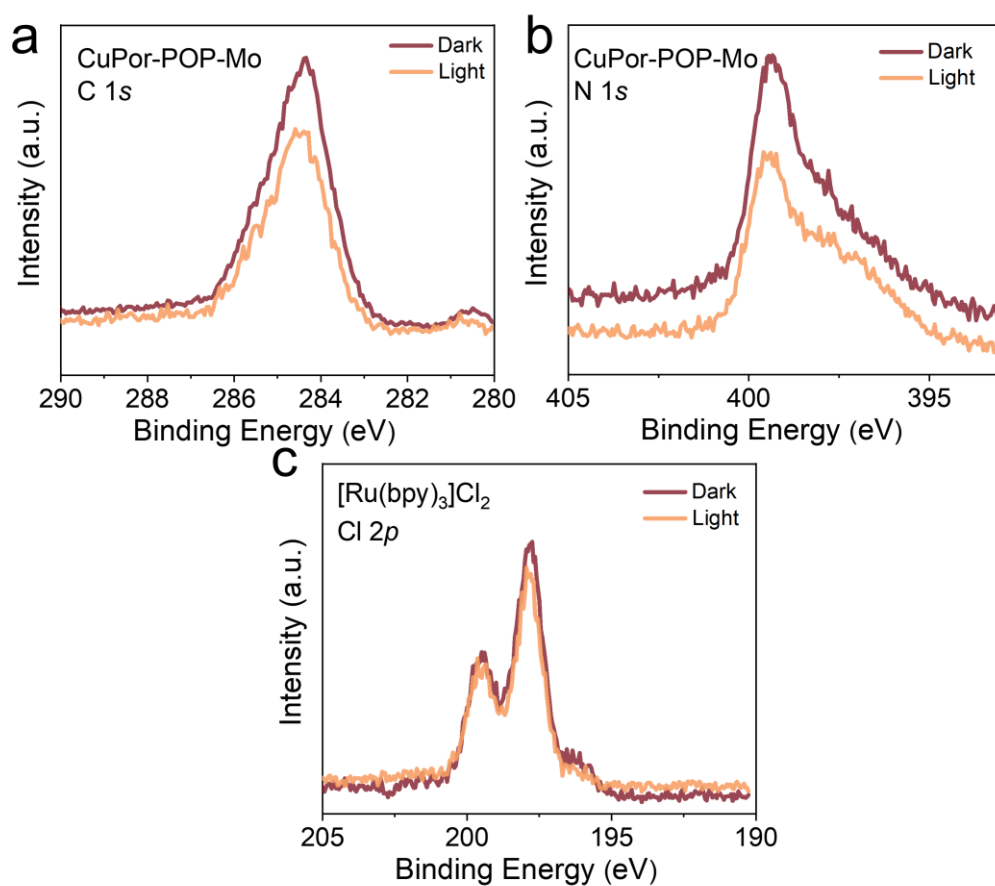

**Supplementary Figure 33 Quasi-in situ XPS spectra. a C 1s, b N 1s and c Cl 2p** before and after light irradiation.

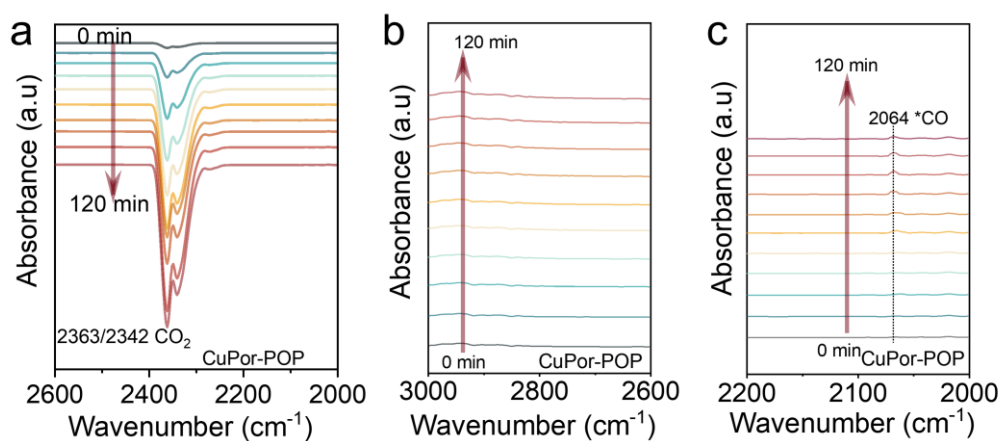

**Supplementary Figure 34 In situ ATR-FTIR spectra.** In situ ATR-FTIR spectra of CuPor-POP for the detection of intermediates during CO<sub>2</sub> photoreduction.

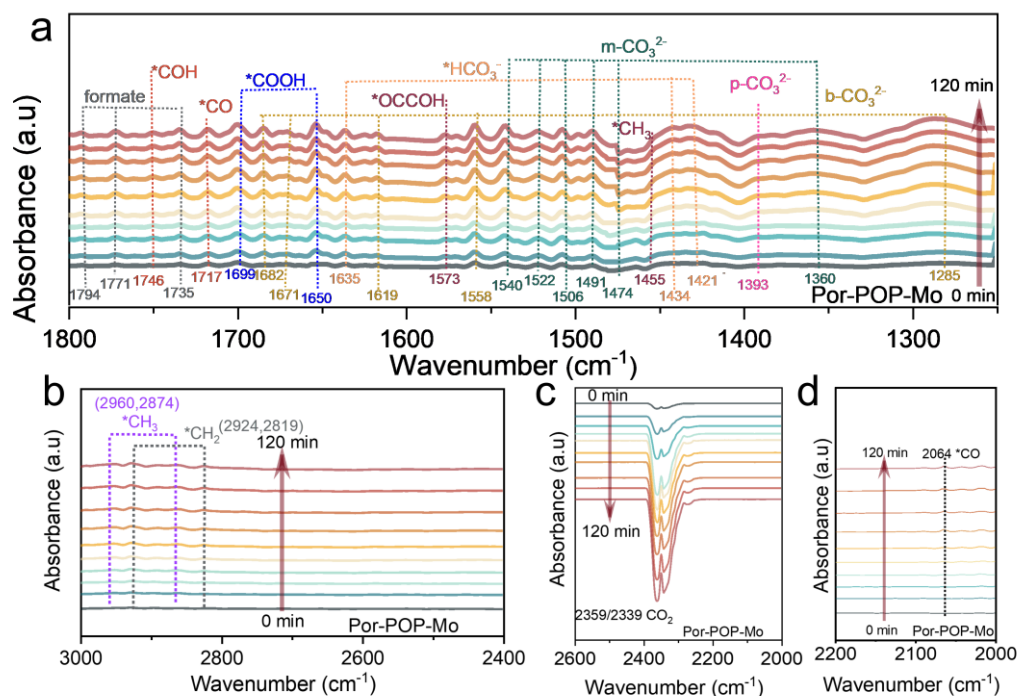

**Supplementary Figure 35 In situ ATR-FTIR spectra.** In situ ATR-FTIR spectra of Por-POP-Mo for the detection of intermediates during CO<sub>2</sub> photoreduction.

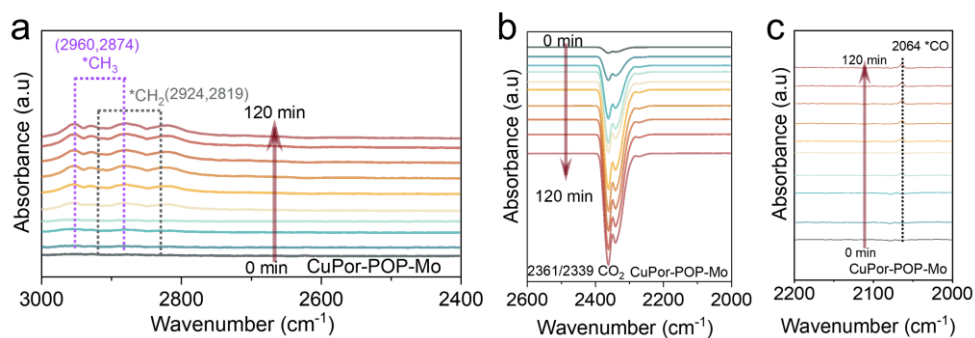

**Supplementary Figure 36 In situ ATR-FTIR spectra.** In situ ATR-FTIR spectra of CuPor-POP-Mo for the detection of intermediates during CO<sub>2</sub> photoreduction.

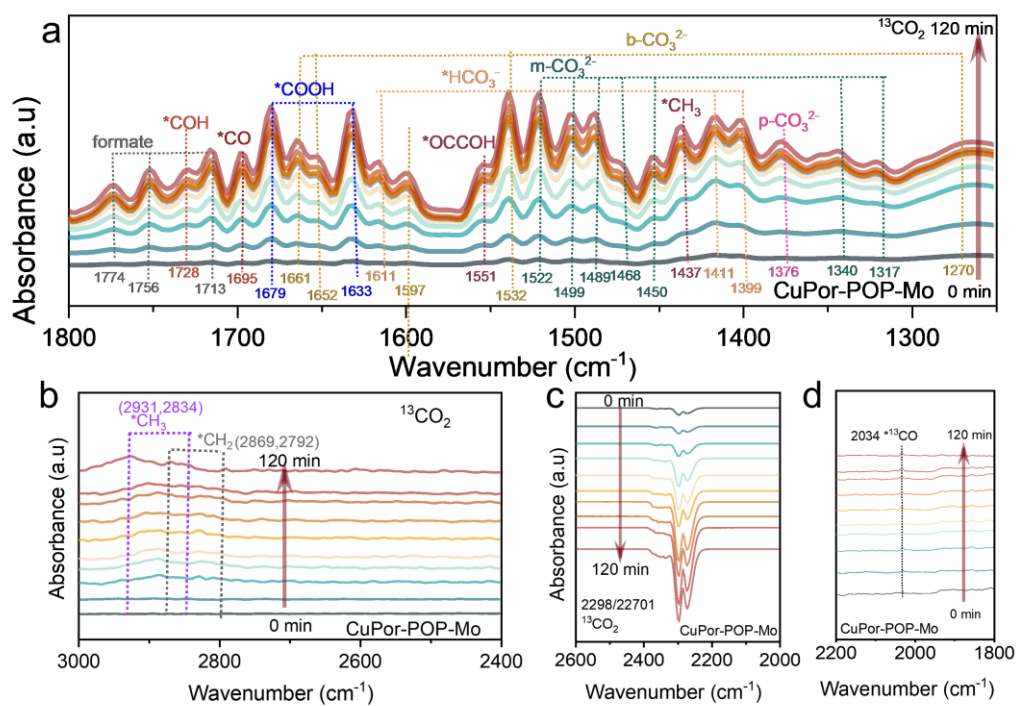

**Supplementary Figure 37 In situ ATR-FTIR spectra.** In situ ATR-FTIR spectra of CuPor-POP-Mo for the detection of intermediates during <sup>13</sup>CO<sub>2</sub> photoreduction.

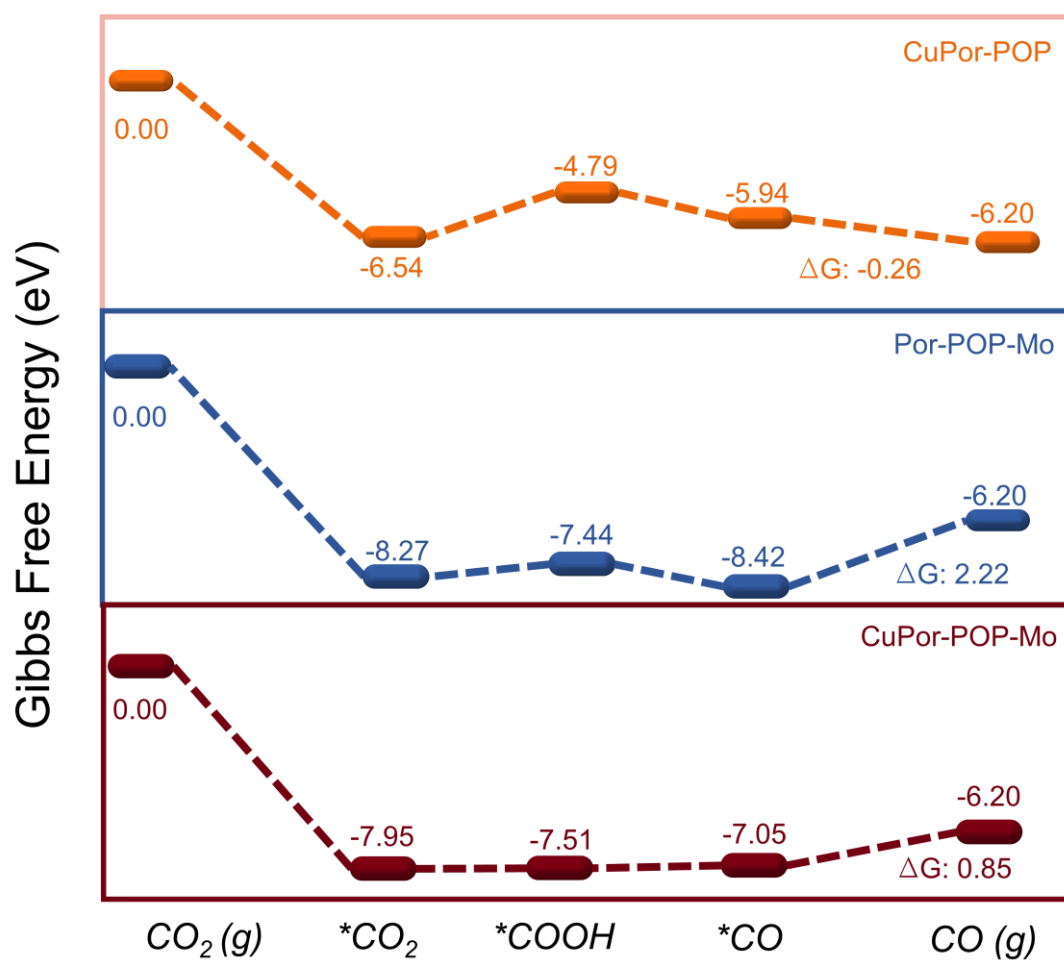

**Supplementary Figure 38** The reaction Gibbs free energy change. Gibbs free energy profile of CuPor-POP, Por-POP-Mo and CuPor-POP-Mo.

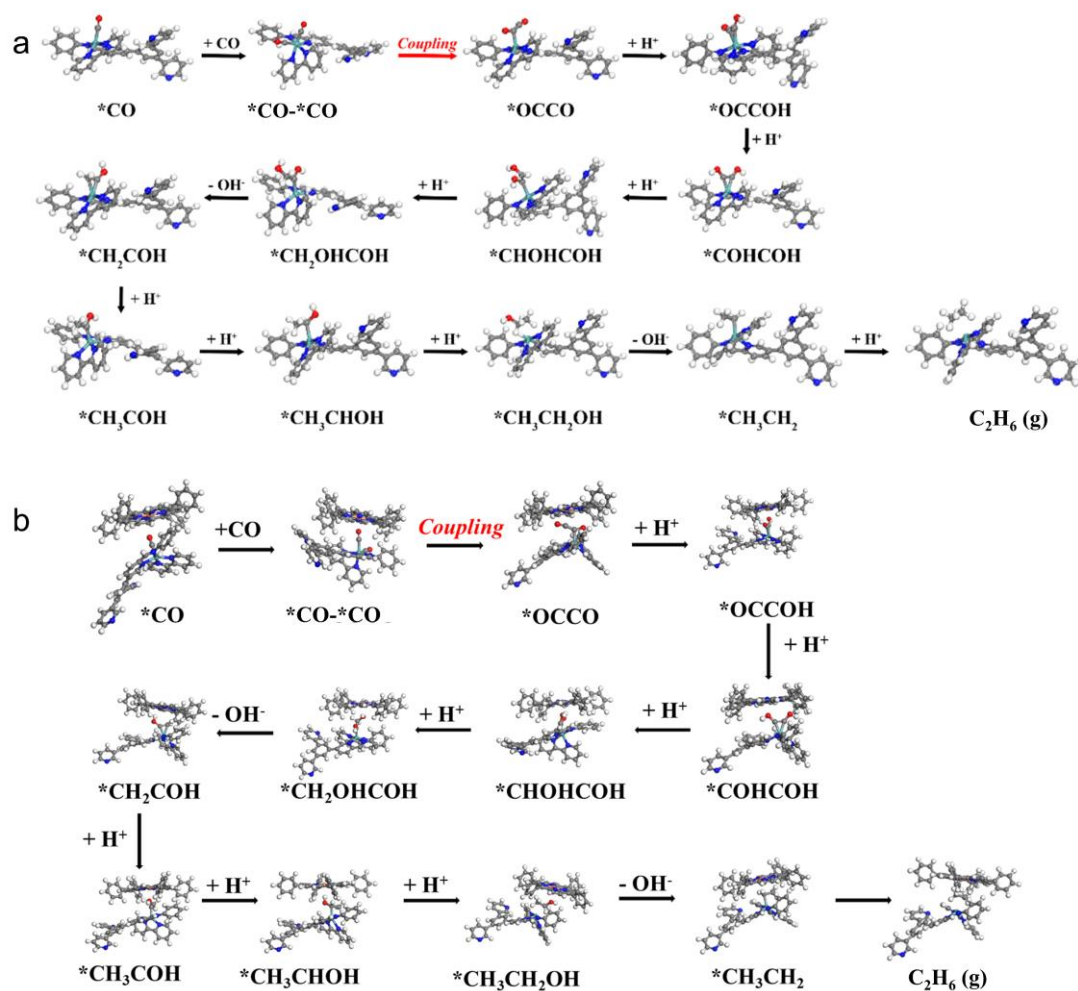

**Supplementary Figure 39 The intermediates of C<sub>2</sub>H<sub>6</sub> pathway.** The intermediates of C<sub>2</sub>H<sub>6</sub> pathway over **a** Por-POP-Mo and **b** CuPor-POP-Mo.



### 3. Supplementary Tables 1-5

**Supplementary Table 1.** EXAFS fitting results of CuPor-POP-Mo<sup>a</sup>

| Sample       | Shell | CN | R(Å)            | $\sigma^2(\text{Å}^2)$ | $\Delta E_0(\text{eV})$ | <i>R factor</i> |
|--------------|-------|----|-----------------|------------------------|-------------------------|-----------------|
| CuPor-POP-Mo | Cu-N  | 4  | $2.02 \pm 0.01$ | $0.009 \pm 0.002$      | $1.25 \pm 1.74$         | 0.018           |
| CuPor-POP-Mo | Mo-N  | 4  | $2.12 \pm 0.01$ | $0.012 \pm 0.003$      | $5.67 \pm 2.25$         | 0.019           |

<sup>a</sup> CN = coordination number, R = interatomic distance (the bond length between central atoms and surrounding coordination atoms) based on fitting results,  $\Delta E_0$  = inner potential correction,  $\sigma^2$  = Debye-Waller factor, and the R factor is used to value the goodness of fit. Fourier transformed  $k_2\chi(k)$  in the R-space using the ARTEMIS module of IFEFFIT  $S_0^2=0.912$  for Cu and  $S_0^2=0.1$  for Mo.

**Supplementary Table 2.** The content of each element in CuPor-POP-Mo determined from XPS

| CuPor-POP-Mo | C     | N    | Cu   | Mo   |
|--------------|-------|------|------|------|
| Atom (%)     | 92.95 | 5.71 | 0.56 | 0.78 |

**Supplementary Table 3.** Performance comparison of CO<sub>2</sub>RR to C<sub>2</sub>H<sub>6</sub> catalyzed by various photocatalysts

| Photocatalyst                                                        | Catalytic condition                                                                    | Light                                                     | Product                                                                                | Production rate for C <sub>2</sub> H <sub>6</sub> (μmol g <sup>-1</sup> h <sup>-1</sup> ) | C <sub>2</sub> H <sub>6</sub> selectivity | Reference |
|----------------------------------------------------------------------|----------------------------------------------------------------------------------------|-----------------------------------------------------------|----------------------------------------------------------------------------------------|-------------------------------------------------------------------------------------------|-------------------------------------------|-----------|
| CuPor-POP-Mo                                                         | TEOA, MeCN, H <sub>2</sub> O, [Ru(bpy) <sub>3</sub> ]Cl <sub>2</sub> 6H <sub>2</sub> O | 300 W Xe lamp (420-780 nm)<br>300 mWcm <sup>-2</sup>      | H <sub>2</sub> , CO<br>C <sub>2</sub> H <sub>4</sub><br>C <sub>2</sub> H <sub>6</sub>  | 472.5                                                                                     | 87.4%                                     | This work |
| Cu SAs/CNP                                                           | TEOA, H <sub>2</sub> O                                                                 | 300 W Xe lamp (Full spectrum)                             | CO,CH <sub>4</sub><br>C <sub>2</sub> H <sub>6</sub>                                    | 616.6                                                                                     | 33%                                       | 9         |
| Au <sub>1</sub> /RP                                                  | KHCO <sub>3</sub> +HCl, H <sub>2</sub> O                                               | 300 W Xe lamp (Full spectrum)                             | CO,CH <sub>4</sub><br>C <sub>2</sub> H <sub>6</sub>                                    | 1.32                                                                                      | 96%                                       | 3         |
| Ba <sub>2</sub> Bi <sub>1.4</sub> Ta <sub>0.6</sub> O <sub>5</sub> S | H <sub>2</sub> O                                                                       | 300 W Xe lamp (Full spectrum)                             | C <sub>2</sub> H <sub>6</sub>                                                          | 5.4                                                                                       | 30.2                                      | 10        |
| Au/ZnO NSs                                                           | H <sub>2</sub> O                                                                       | 300 W Xe lamp (Full spectrum),<br>light intensity 595 mW) | CO,CH <sub>4</sub><br>C <sub>2</sub> H <sub>6</sub>                                    | 27                                                                                        | 36                                        | 11        |
| 0.7Au/ZnSn(OH) <sub>6</sub>                                          | H <sub>2</sub> O                                                                       | 300 W Xe lamp (Full spectrum)                             | CO, H <sub>2</sub><br>CH <sub>4</sub> ,<br>C <sub>2</sub> H <sub>6</sub>               | 0.7                                                                                       | 21                                        | 12        |
| MoS <sub>2</sub> @COF                                                | TEOA, MeCN, H <sub>2</sub> O, [Ru(bpy) <sub>3</sub> ]Cl <sub>2</sub> 6H <sub>2</sub> O | 300 W Xe lamp (420-780 nm)                                | CO,CH <sub>4</sub><br>C <sub>2</sub> H <sub>4</sub> ,<br>C <sub>2</sub> H <sub>6</sub> | 56.2                                                                                      | 83.8                                      | 13        |
| Cu-CuTCPP/g-C <sub>3</sub> N <sub>4</sub>                            | TEA, H <sub>2</sub> O                                                                  | 300 W Xe lamp (360-800 nm)                                | CO,CH <sub>4</sub><br>C <sub>2</sub> H <sub>6</sub>                                    | 18.5                                                                                      | 44                                        | 14        |
| Cu <sub>1.00%</sub> -Pt <sub>0.35%</sub> -BT                         | H <sub>2</sub> O                                                                       | 300 W Xe lamp (>400 nm)                                   | CH <sub>4</sub><br>C <sub>2</sub> H <sub>6</sub>                                       | 25                                                                                        | 4.7                                       | 15        |
| Au@Bi <sub>12</sub> O <sub>17</sub> Br <sub>2</sub> -700             | H <sub>2</sub> O                                                                       | 300 W Xe lamp (Full spectrum)                             | CO,CH <sub>4</sub><br>C <sub>2</sub> H <sub>6</sub>                                    | 29.3                                                                                      | 65                                        | 16        |
| Pt1/ZnNiTi-LDHs-E                                                    | H <sub>2</sub> O, 0.2MPa                                                               | 300 W Xe lamp (380-800 nm)<br>500 mWcm <sup>-2</sup>      | CO,CH <sub>4</sub><br>C <sub>2</sub> H <sub>6</sub>                                    | 29.8                                                                                      | 20.5                                      | 17        |
| Au@TiOx-Co(650)                                                      | H <sub>2</sub> O                                                                       | 300 W Xe lamp (Full spectrum)                             | CO,H <sub>2</sub> ,<br>CH <sub>4</sub><br>C <sub>2</sub> H <sub>6</sub>                | 58.7                                                                                      | 25                                        | 18        |
| Au-CeO <sub>2</sub>                                                  | H <sub>2</sub> O                                                                       | 300 W Xe lamp (Full spectrum)<br>394 mWcm <sup>-2</sup>   | CO,<br>C <sub>2</sub> H <sub>6</sub>                                                   | 11.1                                                                                      | 65.3                                      | 19        |
| CoAl/NiCuNP                                                          | TEOA, H <sub>2</sub> O                                                                 | 300 W Xe lamp (>420 nm)                                   | CO,CH <sub>4</sub><br>C <sub>2</sub> H <sub>6</sub>                                    | 25.3                                                                                      | 27.4                                      | 20        |
| CABB <sub>20</sub> /UiO-66                                           | ethyl acetate, H <sub>2</sub> O,TEA                                                    | 300 W Xe lamp (>420 nm)<br>230 mWcm <sup>-2</sup>         | CO,CH <sub>4</sub><br>C <sub>2</sub> H <sub>6</sub>                                    | 1.3                                                                                       | 8.8                                       | 21        |
| NiSe <sub>2</sub> /g-C <sub>3</sub> N <sub>4</sub>                   | NaOH solution                                                                          | 300 W Xe lamp (Full spectrum)<br>415 mWcm <sup>-2</sup>   | CO,<br>C <sub>2</sub> H <sub>6</sub>                                                   | 46.1                                                                                      | 97.5                                      | 22        |

**Supplementary Table 4.** Apparent quantum efficiency (AQE) of CuPor-POP-Mo at different wavelengths

| Wavelengths (nm) | Intensity (mW cm <sup>-2</sup> ) | AQE (%) |
|------------------|----------------------------------|---------|
| 420              | 15.6                             | 0.530   |
| 450              | 16.0                             | 0.550   |
| 520              | 18.0                             | 0.230   |
| 550              | 19.2                             | 0.140   |
| 600              | 21.3                             | 0.027   |
| 630              | 22.1                             | 0.026   |

**Supplementary Table 5.** Average temperature, sunlight intensity and production rate of C<sub>2</sub>H<sub>6</sub> during the outdoor tests for photocatalytic CO<sub>2</sub> reduction to C<sub>2</sub>H<sub>6</sub>

| Day | Temperature (°C) | Light intensity (mW cm <sup>-2</sup> ) | Production rate of C <sub>2</sub> H <sub>6</sub> (μmol g <sup>-1</sup> h <sup>-1</sup> ) |
|-----|------------------|----------------------------------------|------------------------------------------------------------------------------------------|
| 1   | 26               | 51.2                                   | 283.3                                                                                    |
| 2   | 21               | 47.6                                   | 195.5                                                                                    |
| 3   | 23               | 48.8                                   | 239.2                                                                                    |
| 4   | 17               | 36.1                                   | 163                                                                                      |
| 5   | 21               | 48.1                                   | 213                                                                                      |

## 4. Supplementary References

- 1 Lin, S. et al. Covalent organic frameworks comprising cobalt porphyrins for catalytic CO<sub>2</sub> reduction in water. *Science*. **349**, 1208-1213 (2015).
- 2 Zhang, Q. et al. Designing covalent organic frameworks with Co-O<sub>4</sub> atomic sites for efficient CO<sub>2</sub> photoreduction. *Nat. Commun.* **14**, 1147 (2023).
- 3 Ou, H. et al. Atomically dispersed Au-assisted C-C coupling on red phosphorus for CO<sub>2</sub> photoreduction to C<sub>2</sub>H<sub>6</sub>. *J. Am. Chem. Soc.* **144**, 22075-22082 (2022).
- 4 Huang, N. Y. et al. Electrostatic attraction-driven assembly of a metal-organic framework with a photosensitizer boosts photocatalytic CO<sub>2</sub> reduction to CO. *J. Am. Chem. Soc.* **143**, 17424-17430 (2021).
- 5 Wang, G. et al. Engineering a copper single-atom electron bridge to achieve efficient photocatalytic CO<sub>2</sub> conversion. *Angew. Chem. Int. Ed.* **135**, e202218460 (2023).
- 6 Xie, W.; Sun, W.; Chu, W.; Jiang, C.; Xue, Y. Investigation of the doped transition metal promotion effect on CO<sub>2</sub> chemisorption on Ni (111). *Appl. Surf. Sci.* **258**, 6239-6245 (2012).
- 7 Phung, Q. M.; Hagai, M.; Xiong, X. G.; Yanai, T. Polarization consistent basis sets using the projector augmented wave method: a renovation brought by PAW into Gaussian basis sets. *Phys. Chem. Chem. Phys.* **22**, 27037-27052 (2020).
- 8 Tao, J.; Zhang, Q.; Liu, T. Polaron formation and transport in Bi<sub>2</sub>WO<sub>6</sub> studied by DFT+U and hybrid PBE0 functional approaches. *Phys. Chem. Chem. Phys.* **24**, 22918-22927 (2022).
- 9 Wang, G.; Chen, Z.; Wang, T.; Wang, D.; Mao, J. P and Cu dual sites on graphitic carbon nitride for photocatalytic CO<sub>2</sub> reduction to hydrocarbon fuels with high C<sub>2</sub>H<sub>6</sub> evolution. *Angew. Chem. Int. Ed.* **61**, e202210789 (2022).
- 10 Xu, F.; Li, Z.; Zhu, R.; Chu, Y.; Pan, Z.; Xia, S.; Fu, J.; Xiao, Z.; Ji, X.; Liu, M.; Weng, B. Narrow band-gapped perovskite oxysulfide for CO<sub>2</sub> photoreduction towards ethane. *Appl. Catal. B Environ.* **316**, 121615 (2022).
- 11 Zhao, J. et al. Plasmonic control of solar-driven CO<sub>2</sub> conversion at the metal/ZnO interfaces. *Appl. Catal. B-Environ.* **256**, 117823 (2019).
- 12 Lu, L. et al. Multifunctional Au/hydroxide interface toward enhanced C-C coupling for solar-driven CO<sub>2</sub> reduction into C<sub>2</sub>H<sub>6</sub>. *Inorg. Chem.* **62**, 2934-2941 (2023).

- 13 Yang, X.; Lan, X.; Zhang, Y.; Li, H.; Bai, G. Rational design of MoS<sub>2</sub>@COF hybrid composites promoting C-C coupling for photocatalytic CO<sub>2</sub> reduction to ethane. *Appl. Catal. B-Environ.* **325**, 122393 (2023).
- 14 Xie, S. et al. Self-reconstruction of paddle-wheel copper-node to facilitate the photocatalytic CO<sub>2</sub> reduction to ethane. *Appl. Catal. B-Environ.* **310**, 121320 (2022).
- 15 Sorcar, S. et al. CO<sub>2</sub>, water, and sunlight to hydrocarbon fuels: a sustained sunlight to fuel (Joule-to-Joule) photoconversion efficiency of 1%. *Energy Environ. Sci.* **12**, 2685-2696 (2019).
- 16 Wang, Y. et al. Synergy between plasmonic and sites on gold nanoparticle-modified bismuth-rich bismuth oxybromide nanotubes for the efficient photocatalytic C-C coupling synthesis of ethane. *J. Collid. Interf. Sci.* **616**, 649-658 (2022).
- 17 Fan, J. et al. Light-induced structural dynamic evolution of Pt single atoms for highly efficient Pphotocatalytic CO<sub>2</sub> reduction. *ACS Appl. Mater. Interfaces.* **14**, 26752-26765 (2022).
- 18 Fan, J. et al. Integrating Au@TiO<sub>x</sub> and Co sites in a tandem photocatalyst for efficient C-C coupling synthesis of ethane. *J. CO<sub>2</sub>. Util.* **67**, 102333 (2023).
- 19 Ji, J. et al. Highly selective photocatalytic reduction of CO<sub>2</sub> to ethane over Au-O-Ce sites at micro-interface. *Appl. Catal. B-Environ.* **321**, 122020 (2023).
- 20 Pan, W. G.; Li, C. F.; Zhang, Z. R.; Wu, T.; Guo, R. T. Efficient CO<sub>2</sub> reduction under visible light: Synergistic effects of Cu nanoparticles and Ni single atoms. *Appl. Catal. B-Environ.* **343**, 123492 (2024).
- 21 Xiong, W. et al. Highly stable lead-free perovskite Cs<sub>2</sub>AgBiBr<sub>6</sub>/UiO-66 Z-scheme heterostructures with enhanced photocatalytic activity for CO<sub>2</sub> photoreduction and organic dyes degradation. *Appl. Surf. Sci.* **644**, 158807 (2024).
- 22 Jia, J. et al. Nickel selenide/g-C<sub>3</sub>N<sub>4</sub> heterojunction photocatalyst promotes C-C coupling for photocatalytic CO<sub>2</sub> reduction to ethane. *J. Colloid. Interf. Sci.* **658**, 966-975 (2024).
